# Supplementary material
Source: Royal Society of Chemistry journal article supplement (doi:10.1039/d6dt01182a)
Supplement: d6dt01182a1.pdf [file d6dt01182a1.pdf]

## Supporting Information

### ***N*-Bridged bis-amidine *N*-oxides – a versatile platform in metallosupramolecular chemistry**

Mathieu Lepage,<sup>a</sup> Marine Devos,<sup>b</sup> Sammy Touaibia,<sup>b</sup> Garry S. Hanan,<sup>b,\*</sup> and Mihaela Cibian<sup>a,b,\*</sup>

---

<sup>a</sup>*Département de biochimie, chimie, physique et science forensique et l'Institut de recherche sur l'hydrogène, Université du Québec à Trois-Rivières Trois-Rivières, QC, G9A 5H7 Canada.*

<sup>b</sup>*Département de chimie, Université de Montréal, Montréal, QC, H2V 0B3, Canada.*

\*Corresponding authors email addresses:

garry.hanan@umontreal.ca  
mihaela.cibian@uqtr.ca

## Table of Contents

|                                                                                    |    |
|------------------------------------------------------------------------------------|----|
| 1. Introduction .....                                                              | 3  |
| 2. Material and Instrumentation .....                                              | 5  |
| 3. Experimental Procedure .....                                                    | 6  |
| 3.1. Synthesis of PPSE (polyphosphoric acid trimethylsilyl ester).....             | 6  |
| 3.2. Synthesis of <i>N</i> -bridged bis-AMOX-based Compounds .....                 | 6  |
| 4. IR Spectra .....                                                                | 11 |
| 5. NMR Spectra.....                                                                | 13 |
| 6. X-ray Diffraction Measurements and the Solid State Structure Determination..... | 20 |
| 7. Electronic Spectra .....                                                        | 25 |
| 8. Thermogravimetric Analysis.....                                                 | 26 |
| 9. Atomic Coordinates Tables for DFT Optimized Structures.....                     | 26 |
| 10. References .....                                                               | 35 |

## 1. Introduction

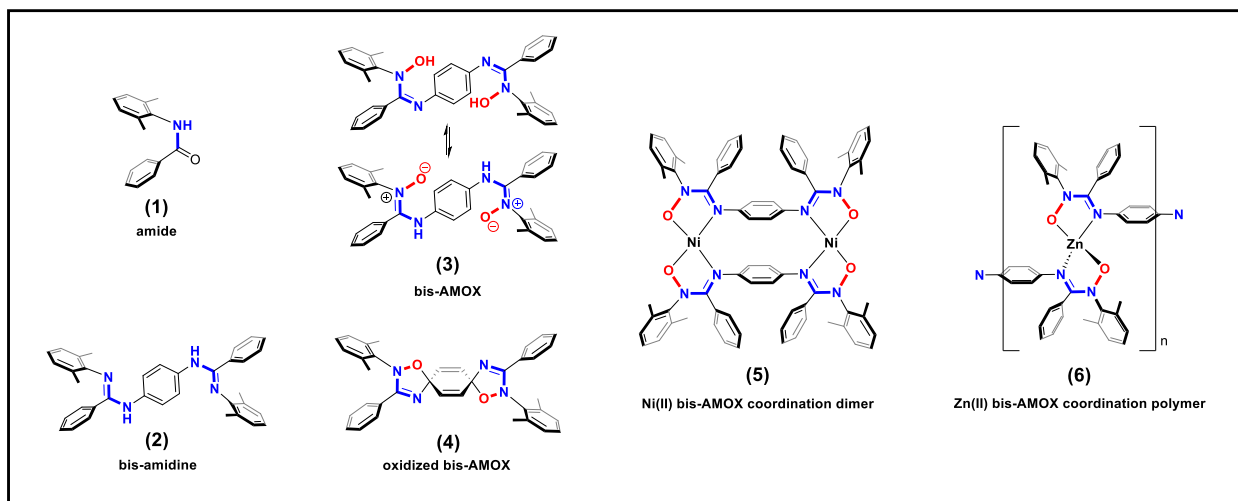

Chart S1. ChemDraw structures of compounds 1-6 presented in this work.

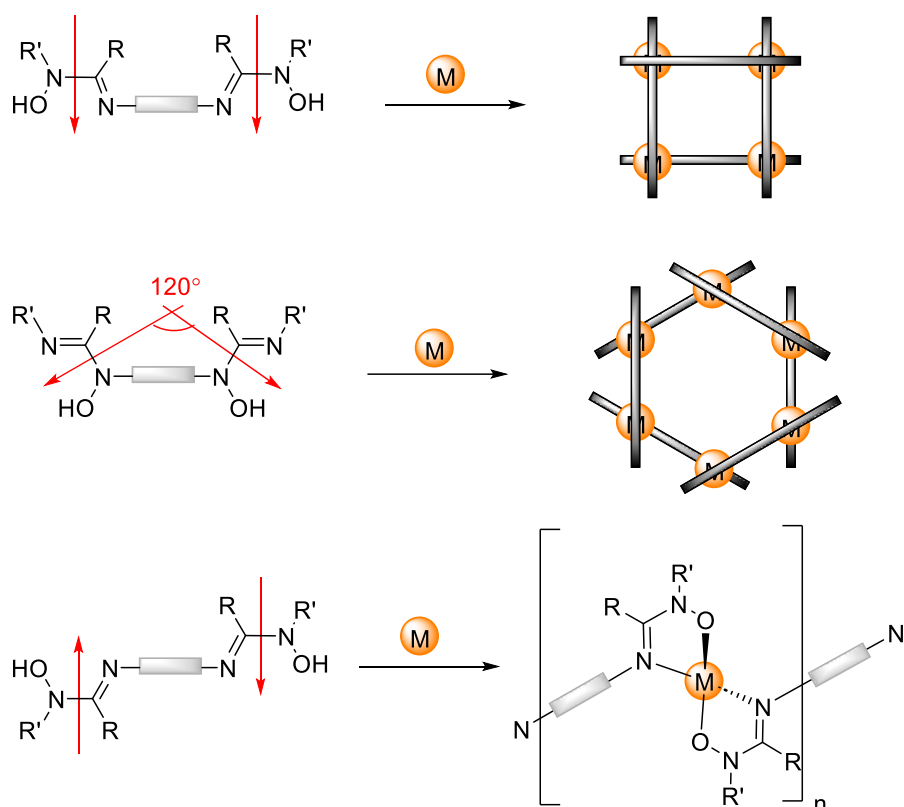

Fig. S1. *N*-bridged bis-AMOX supramolecular multimetallic systems, governed by the coordination vectors of the ligand and the preferred geometry of the metal ion (e.g., tetrahedral or square-planar), open pathways toward both discrete assemblies and polymeric structures.

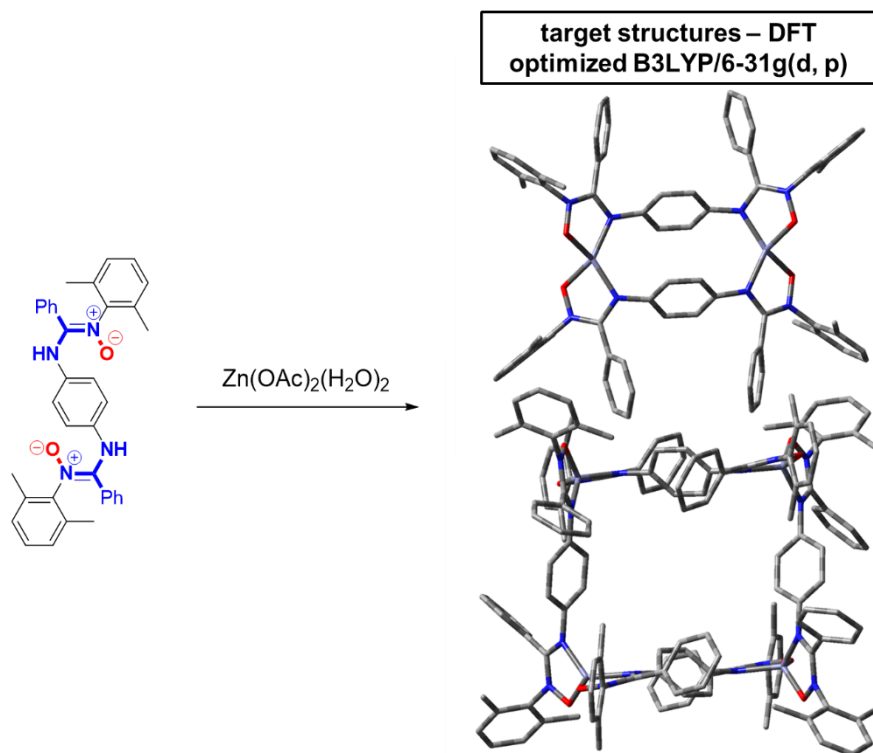

**Fig. S2.** Coordination of *N*-bridged bis-AMOX ligand (**3**) with Zn(II) metal-ions: expected discrete assemblies (**dimer** and **grid**) (models\*).

\*Gaussian09, Revision D.01<sup>1</sup> was used for all theoretical calculations discussed herein, with B3LYP<sup>2</sup> DFT method, 6,31-g(d,p)<sup>3</sup> basis set, in gas phase or using PCM<sup>4</sup> (DCM) solvation model. No symmetry constraints were used for the geometry optimization. GaussView 3.0.9<sup>5</sup> software was used for visualisation and plots. Initial atom coordinates for geometry optimization were obtained using Chem3D in ChemDraw (PerkinElmer). The atomic coordinates for the optimized structures are given in Tables S2 and S3.

## 2. Material and Instrumentation

Nuclear magnetic resonance (NMR) spectra were recorded in  $\text{CDCl}_3$  and/ or  $\text{DMSO}-d_6$  at room temperature (r.t.) (unless otherwise stated) on the following spectrometers: Bruker AV-400, AV-300, DRX-400, and ARX-300 MHz. Chemical shifts ( $\delta$ ) are reported in parts per million (ppm) relative to TMS, using the residual solvent protons (7.26 ppm or 2.50 ppm) as reference. Infrared (IR) spectra were recorded using a Thermo Scientific Nicolet iS10 FT-IR spectrometer. Absorption spectra were measured in toluene (concentration range  $10^{-4}$  –  $10^{-6}$  M) at r.t. on a Cary 500i and a Cary 6000i UV-Vis-NIR Spectrophotometer. Luminescence spectra were obtained using a Perkin Elmer LS55 Luminescence Spectrometer equipped with an accessory for measuring solid state samples. Thermogravimetric analyses (TGA) were carried out on a TA Q-500 and a TGA2950 thermogravimetric analyzer (TA Instruments) under  $\text{N}_2$  atmosphere, in the 25 – 600 °C temperature range, at a heating rate of 10 °C/min. The mass spectrometry analyses were performed on a Bruker microTOF II instrument by electrospray ionization (ESI) method, in positive mode. The microanalyses were done by the Mass Spectrometry Service and the Elemental Analysis Service at Université de Montréal. Solvents, purchased from VWR and Fisher, were removed under reduced pressure using a rotary evaporator, unless otherwise stated. The *m*-CPBA from Acros Organics and carboxylic acids, hexamethyldisiloxane,  $\text{P}_2\text{O}_5$ , and metal salts from Aldrich, were used without further purification. The anilines from Aldrich were purified by sublimation (1,4-phenylenediamine) and distillation (2,6-dimethylaniline) before being used.

### 3. Experimental Procedure

#### 3.1. Synthesis of PPSE (polyphosphoric acid trimethylsilyl ester)

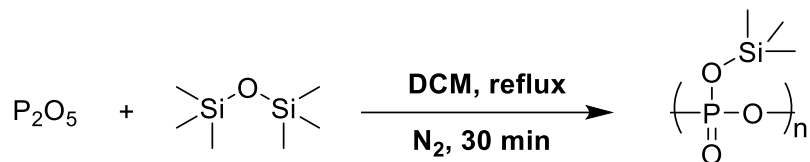

Fig. S3. Synthesis of the polymer **PPSE**

**Polyphosphoric acid trimethylsilyl ester.** The PPSE (a condensing and dehydrating agent) was obtained as a colorless viscous liquid by refluxing  $\text{P}_2\text{O}_5$  with hexamethyldisiloxane (HMDS) (stoichiometry 1 to 1.5) in dry DCM for 30 min under  $\text{N}_2$ . The solvent was then evaporated. A detailed synthetic procedure, including reagent and solvent quantities for PPSE preparation, is provided in Section 3.2, which describes the preparation of **bis-amidine (2)**.

#### 3.2. Synthesis of *N*-bridged bis-AMOX-based Compounds

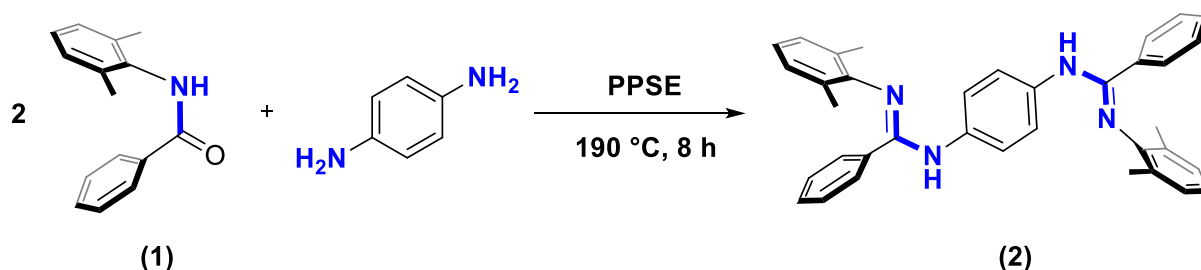

Fig. S4. Synthesis of *N*-bridged **bis-amidine (2)**.

**Bis-amidine (2) – *N,N'*-(1,4-phenylene)bis(*N'*-(2,6-dimethylphenyl)benzimidamide).** The synthesis of *N*-bridged **bis-amidine (2)** was carried out based on modified literature procedures for amidine synthesis, via condensation between 1,4-phenylenediamine (0.05 g, 0.47 mmol, 1 equiv.) and **amide (1)** (previously reported)<sup>6</sup> (0.21 g, 0.93 mmol, 2 equiv.) in polyphosphoric acid trimethylsilyl ester (PPSE).<sup>7</sup> PPSE was prepared by refluxing  $\text{P}_2\text{O}_5$  (2.18 g, 15.1 mmol, 33 equiv. (vs. 1,4-phenylenediamine)) with hexamethyldisiloxane (HMDS) (5 mL, 23.5 mmol, 50 equiv. (vs. 1,4-phenylenediamine)) in dry DCM (5 mL) under  $\text{N}_2$  for 30 min. The solvent was then evaporated. The two starting materials (1,4-phenylenediamine and **amide (1)**) were

combined with the freshly prepared PPSE, and the reaction mixture was heated at 190 °C for 8 h. After cooling to room temperature, the reaction mixture was quenched with 1 M aqueous NaOH (40 mL). A beige solid was isolated, recrystallized from aqueous ethanol, and dried under vacuum to afford the pure compound as a colorless powder. Yield 0.19 g, 77%.  $^1\text{H}$  NMR (400 MHz,  $\text{DMSO-}d_6$ , 110 °C)  $\delta$ , ppm: 8.30 (br. s, 2H,  $-\text{NH}$ ), 7.49 (br. s, 4H,  $\text{H-Ph}^{\text{bridge}}$ ) 7.35 – 7.25 (m, 10H,  $\text{H-Ph}$ ), 6.85 (br. s, 4H,  $\text{H}^{\text{meta-2,6-diMePh}}$ ), 6.67 (br. s, 2H,  $\text{H}^{\text{para-2,6-diMePh}}$ ), 2.07 (br. s, 12H,  $-\text{CH}_3$ ).  $^{13}\text{C}$  NMR (101 MHz,  $\text{DMSO-}d_6$ , 110 °C)  $\delta$ , ppm: 135.4 (2C), 128.4 (4C), 127.2 (8C), 126.8 (6C), 120.4 (6C), 17.6 (4C). (Fig. S14-S17). MS (ESI - DCM) (m/z): 523.3  $[\text{M}+\text{H}]^+$  (100%); 262.2  $[\text{M}+2\text{H}]^{2+}$  (17%). Elemental Analysis: *calc.* (%) for  $\text{C}_{36}\text{H}_{34}\text{N}_4$ : C 82.72, H 6.56, N 10.72; *found*: C 82.53, H 6.60, N 10.78. IR (ATR, solid sample,  $\text{cm}^{-1}$ ): 3395, 3060, 3034, 3009, 2957, 2915, 1644, 1589, 1578, 1540, 1511, 1490, 1463, 1443, 1399, 1376, 1346, 1321, 1248, 1234, 1212, 1129, 1116, 1102, 1083, 1030, 922, 913, 837, 780, 758, 697, 678, 564. (Fig. S9).

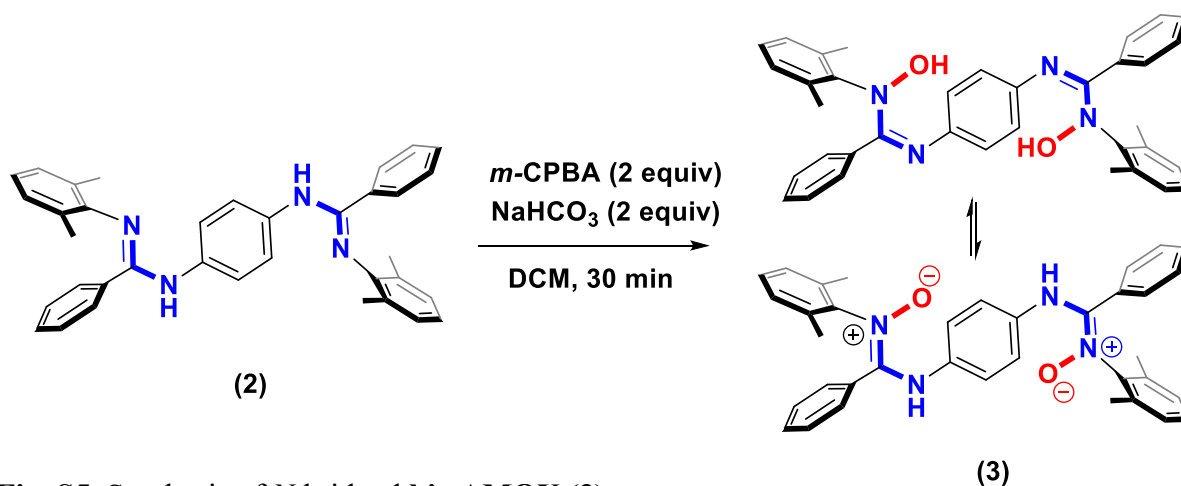

**Fig. S5.** Synthesis of *N*-bridged bis-AMOX (3)

**Bis-AMOX (3) – *N,N'*-(1,4-phenylene)bis(*N'*-(2,6-dimethylphenyl)benzimidamide oxide).**

To a solution of the *N*-bridged bis-amidine (2) (0.64 g, 1.2 mmol, 1 equiv.) in DCM (100 mL) was added  $\text{NaHCO}_3$  (0.21 g, 2.4 mmol, 2 equiv.) as a solid, followed by slow addition (at 0 °C) of a solution of *m*-CPBA (0.43 g, 2.4 mmol, 2 equiv.) in DCM (100 mL). The reaction mixture was stirred and allowed to warm to room temperature over 30 min, then filtered and washed successively with 1 M aqueous NaOH ( $2 \times 50$  mL) and water ( $2 \times 50$  mL). The combined organic layers were dried over anhydrous  $\text{MgSO}_4$ , filtered, and concentrated under reduced pressure to yield a yellow-brown solid, which was further purified by flash column chromatography on silica (gradient of eluents: hexane/ EtOAc (5:5), EtOAc 100%, EtOAc/ EtOH (5:5), EtOH 100%). The

purified solid was dissolved in DCM and filtered to remove any traces of silica potentially solubilized by the use of EtOH. After solvent removal under reduced pressure, the pure product was obtained as a yellow powder and dried under vacuum overnight. Yield: 0.33 g, 49%.  $^1\text{H}$  NMR ( $\text{CDCl}_3$ , 400 MHz)  $\delta$ , ppm: 7.23 (t,  $J = 7.4$  Hz, 2H,  $H^{\text{para}}$ -Ph) 7.12 (t,  $J = 7.7$  Hz, 4H,  $H^{\text{meta}}$ -Ph), 7.06 – 7.00 (m, 6H,  $H^{\text{para}}$ -2,6-diMePh and  $H^{\text{ortho}}$ -Ph), 6.93 (d,  $J = 7.6$  Hz, 4H,  $H^{\text{meta}}$ -2,6-diMePh), 6.48 (s, 4H,  $H$ -Ph<sup>bridge</sup>), 2.25 (s, 12H,  $\text{CH}_3$ ).  $^{13}\text{C}$  NMR ( $\text{CDCl}_3$ , 101 MHz)  $\delta$ , ppm: 148.4 (2C), 141.2 (2C), 134.6 (2C), 134.2 (4C), 130.3(2C), 128.9 (4C), 128.8 (2C), 128.5 (8C), 127.1 (2C), 122.5 (4C), 17.6 (4C). (Fig. S14 and Fig. S18-S20)). MS (ESI - DCM) ( $m/z$ ): 555.2 [ $\text{M}+\text{H}$ ]<sup>+</sup> (100%). Elemental Analysis: *calc.* (%) for  $\text{C}_{36}\text{H}_{34}\text{N}_4\text{O}_2$  ( $\text{H}_2\text{O}$ ): C 75.50, H 6.34, N 9.78; *found*: C 75.82, H 6.22, N 9.88. IR (ATR, solid sample,  $\text{cm}^{-1}$ ): 3058, 2954, 2921, 1735, 1597, 1570, 1515, 1468, 1446, 1400, 1376, 1243, 1206, 1155, 1098, 1076, 1057, 1026, 937, 915, 840. 771, 743, 695, 650, 617, 605, 579. (Fig. S10). X-ray quality yellow crystals (plates) were obtained at r. t. by slow diffusion of hexane into a DCM solution of the compound. The solid-state structure of **3** is presented in Fig. S27.

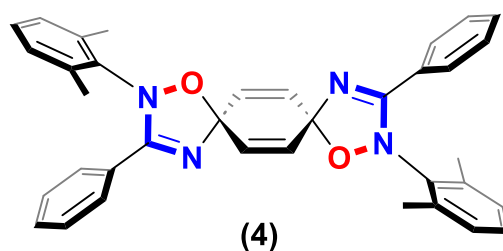

**Fig. S6.** Structure of oxidized bis-AMOX (**4**).

**Oxidized bis-AMOX (4) – 2,10-bis(2,6-dimethylphenyl)-3,11-diphenyl-1,9-dioxa-2,4,10,12-tetraazadispiro[4.2.4<sup>8</sup>.2<sup>5</sup>] tetradeca-3,6,11,13-tetraene.** Compound **4** was obtained as a secondary product during the synthesis of bis-AMOX (**3**). It was isolated as pale yellow/colorless powder following flash chromatography used for the purification of **3**. During optimization tests for the synthesis of **3**, monitored by thin layer chromatography (TLC), the formation of compound **4** was found to increase significantly with higher reactant concentrations and reached near-quantitative conversion when an excess of *m*-CPBA was used with bis-amidine (**2**). Isolation of compound **4** and yield determination for were not performed in these test reactions. A full investigation into the direct synthesis and coordination chemistry of compound **4** is currently underway, and the findings will be reported in future publications.  $^1\text{H}$  NMR ( $\text{CDCl}_3$ , 400 MHz)  $\delta$ , ppm: 7.54 – 7.51 (m, 4H,  $H^{\text{ortho}}$ -Ph) 7.37 – 7.33 (m, 2H,  $H^{\text{para}}$  Ph), 7.24 – 7.21 (m, 4H,  $H^{\text{meta}}$ -Ph), 7.16 (t,  $J = 7.5$  Hz, 2H,  $H^{\text{para}}$ -2,6-diMePh), 7.02 (d,  $J = 7.3$  Hz, 4H,  $H^{\text{meta}}$ -2,6-

diMePh), 6.34 (s, 4H,  $H\text{-Ph}^{\text{bridge}}$ ), 2.37 (s, 12H,  $-\text{CH}_3$ ).  $^{13}\text{C}$  NMR ( $\text{CDCl}_3$ , 101 MHz)  $\delta$ , ppm: 160.8 (2C), 139.3 (4C), 137.5 (2C), 131.1 (2C), 130.1 (2C), 129.7 (2C), 129.5 (2C), 129.2 (4C), 128.4 (4C), 127.9 (4C), 127.6 (2C), 96.5 (2C) 18.3 (4C). (Fig. S21-S23). MS (ESI - DCM) ( $m/z$ ): 553.2  $[\text{M}+\text{H}]^+$  (100%). Elemental Analysis: *calc.* (%) for  $\text{C}_{36}\text{H}_{32}\text{N}_4\text{O}_2(\text{H}_2\text{O})_2$ : C 73.45, H 6.16, N 9.52; *found*: C 73.87, H 5.91, N 9.61. IR (ATR, solid sample,  $\text{cm}^{-1}$ ): 3372, 3058, 3003, 2963, 2916, 2360, 1608, 1597, 1566, 1494, 1473, 1447, 1408, 1350, 1313, 1294, 1131, 1067, 1027, 986, 881, 818, 791, 771, 691, 681. (Fig. S11). X-ray quality pale yellow/colourless single crystals (blocks) were formed at r. t., by diffusion of hexane into a DCM solution of the compound. Its solid-state structure is presented in Fig. S28.

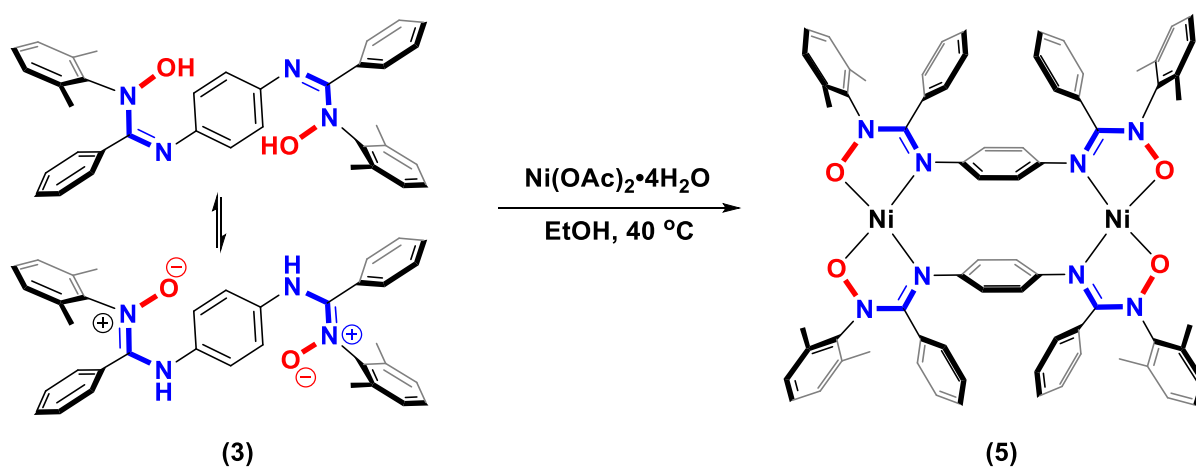

**Fig. S7.** Coordination of *N*-bridged bis-AMOX ligand (3) with Ni(II) ions, yielding Ni(II) bis-AMOX coordination dimer (5).

**Ni(II) bis-AMOX coordination dimer (5).** A solution of the bis-AMOX (3) ligand (5.5 mg, 0.01 mmol, 1 equiv.) in EtOH (5 mL) was heated for 10 min at 40 °C and added to a solution of Ni(AcO)<sub>2</sub>·4H<sub>2</sub>O (2.5 mg, 0.01 mmol, 1 equiv.) in EtOH (2 mL), which had also been preheated at 40 °C for 10 min. The reaction mixture was stirred at 40 °C for 1 h and then stored at 4 °C overnight. The resulting precipitate was collected by filtration and isolated as a yellow/brown solid. The product was obtained quantitatively.  $^1\text{H}$  NMR ( $\text{CDCl}_3$ , 400 MHz)  $\delta$ , ppm: 6.83 – 6.76 (m, 4H,  $H^{\text{para}}\text{-Ph}$  and  $H^{\text{para}}\text{-2,6-diMePh}$ ), 6.71 (d,  $J = 7.8$  Hz, 4H,  $H^{\text{meta}}\text{-2,6-diMePh}$ ), 6.66 (t,  $J = 7.7$  Hz, 4H)  $H^{\text{meta}}\text{-Ph}$ ), 6.55 (d,  $J = 7.2$  Hz, 4H,  $H^{\text{ortho}}\text{-Ph}$ ), 5.92 (s, 4H,  $H\text{-Ph}^{\text{bridge}}$ ), 2.38 (s, 12H,  $-\text{CH}_3$ ).  $^{13}\text{C}$  NMR ( $\text{CDCl}_3$ , 101 MHz)  $\delta$ , ppm: 157.1 (2C), 140.2 (4C), 138.9 (2C), 136.9 (4C), 130.2 (2C), 128.4 (4C), 128.1 (6C), 127.6 (4C), 127.3 (4C), 18.4 (4C). (Fig. S24-S26). MS (ESI – DCM/EtOH) ( $m/z$ ): 1243.3  $[\text{M}+\text{Na}]^+$  (100%). Elemental Analysis: *calc.* (%) for  $\text{C}_{72}\text{H}_{64}\text{N}_8\text{Ni}_2\text{O}_4(\text{CH}_3\text{CH}_2\text{OH})(\text{H}_2\text{O})_3$ : C 67.19, H 5.79, N 8.47; *found*: C 67.05, H 5.41, N 8.24.

IR (ATR, solid sample,  $\text{cm}^{-1}$ ): 3061, 3027, 2955, 2922, 2854, 1582, 1542, 1505, 1471, 1441, 1405, 1377, 1304, 1258, 1205, 1166, 1145, 1097, 1075, 1017, 979, 966, 919, 856, 819, 794, 774, 756, 725, 716, 697, 664, 650, 622, 559. (Fig. S12). X-ray quality yellow/brown crystals were obtained from aqueous EtOH at 4 °C. The solid-state structure of **5** is presented in Figure 2 (article) and Fig. S29.

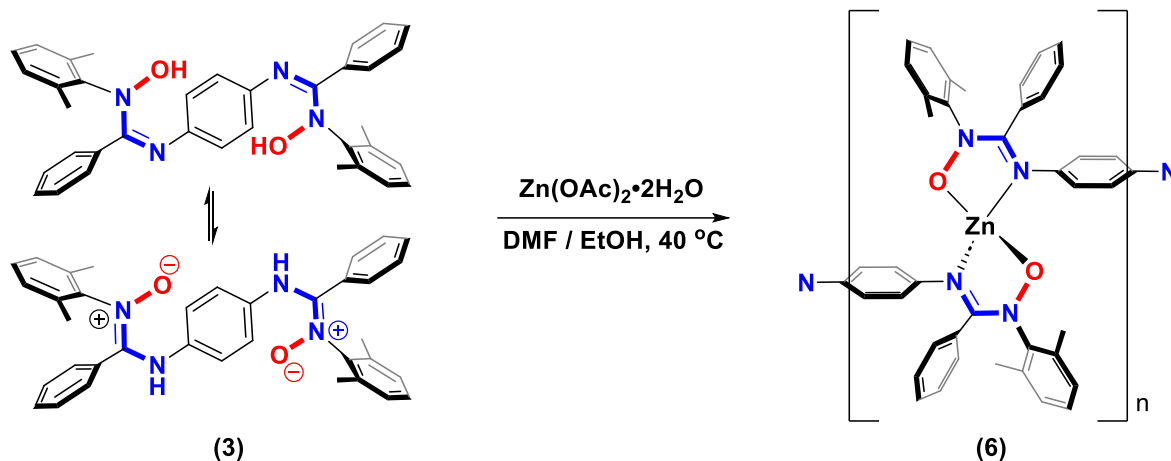

**Fig. S8.** Coordination of *N*-bridged bis-AMOX ligand (**3**) with Zn(II) ions, yielding Zn(II) bis-AMOX coordination polymer (**6**).

**Zn(II) bis-AMOX coordination polymer (6).** The synthesis of this compound was adapted from a previously reported protocol for the preparation of metallomacrocylic complexes.<sup>8</sup> A solution of the bis-AMOX (**3**) ligand (55 mg, 0.1 mmol, 1 equiv.) in DMF (5 mL) and EtOH (2 mL) was added over 30 min (syringe pump) at 40 °C to a solution of Zn(OAc)<sub>2</sub>·2H<sub>2</sub>O (22 mg, 0.1 mmol, 1 equiv.) in DMF (2 mL), which was had been preheated at 40 °C for 10 min. The reaction mixture was maintained at 40 °C for an additional 30 min and left at r.t. overnight. The resulting precipitate was collected by filtration and isolated as a yellow solid (42 mg obtained after drying under vacuum). The compound is very poorly soluble in common solvents, and NMR characterization was hindered by its low solubility. IR (ATR, solid sample,  $\text{cm}^{-1}$ ): 3383, 3029, 2921, 1603, 1583, 1511, 1442, 1376, 1256, 1209, 1166, 1149, 1099, 1015, 961, 917, 838, 770, 745, 698, 596. (Fig. S13). Very poor quality single crystals (very fine yellow needles) were obtained by slow evaporation of a hot toluene solution of the compound. The solid-state structure of **6** is presented in Figure 3 (article) and Fig. S30. T<sub>d</sub> (TGA, 5% weight loss): 320 °C (Fig. S32).

## 4. IR Spectra

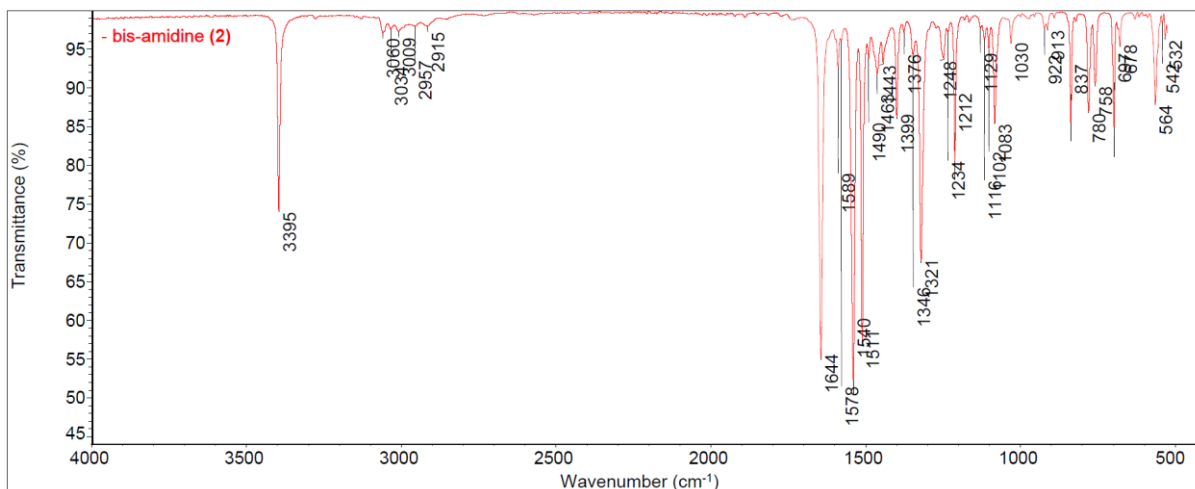

Fig. S9. IR spectrum of bis-amidine (2).

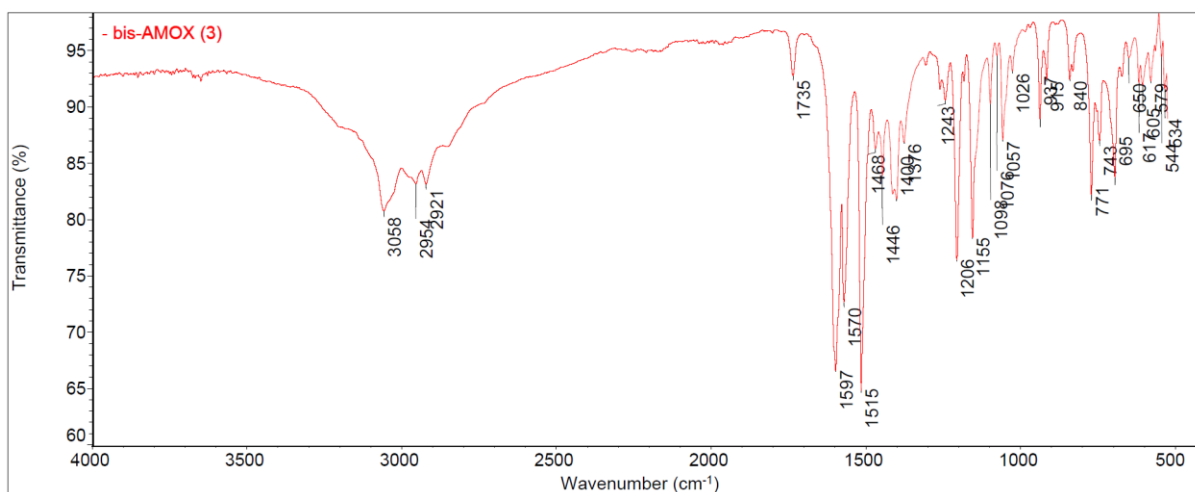

Fig. S10. IR spectrum of bis-AMOX (3).

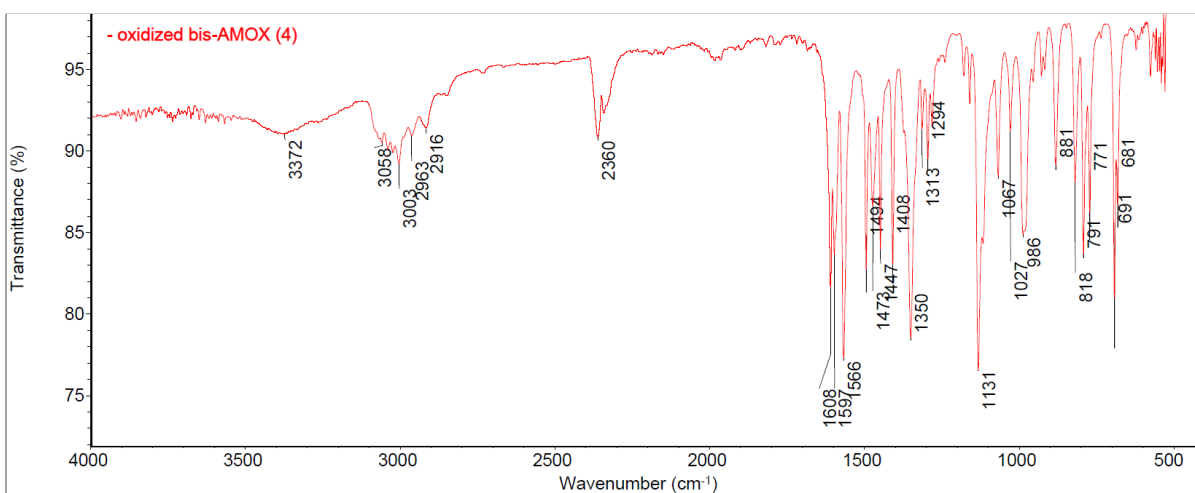

Fig. S11. IR spectrum of oxidized bis-AMOX (4).

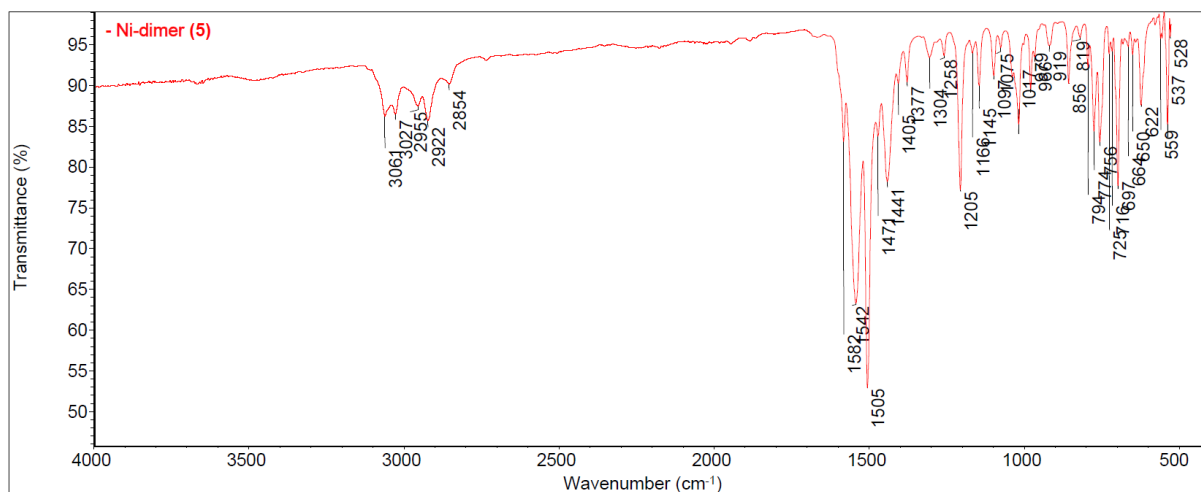

**Fig. S12.** IR spectrum of Ni(II) bis-AMOX coordination dimer (5).

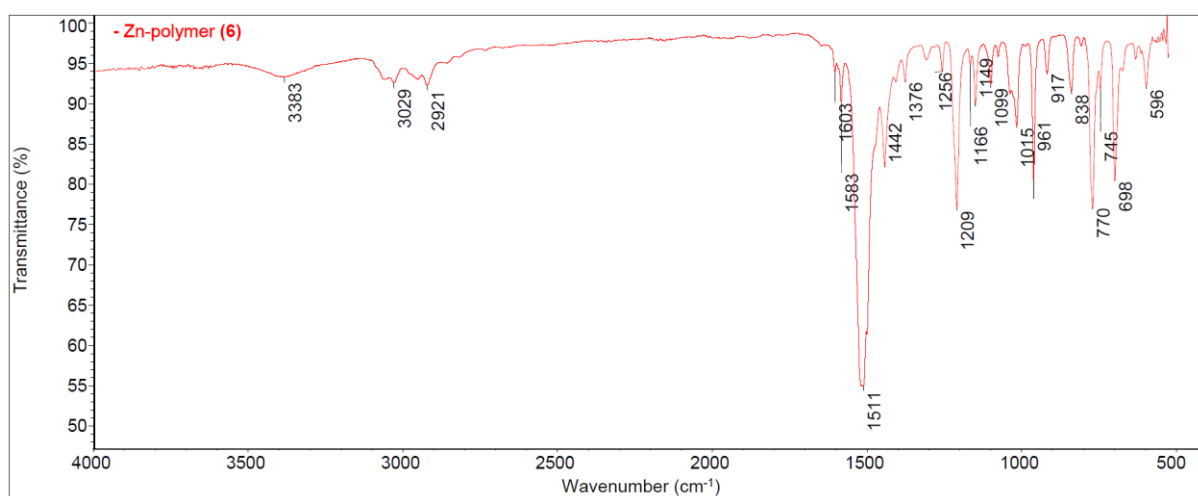

**Fig. S13.** IR spectrum of Zn(II) bis-AMOX coordination polymer (6).

## 5. NMR Spectra

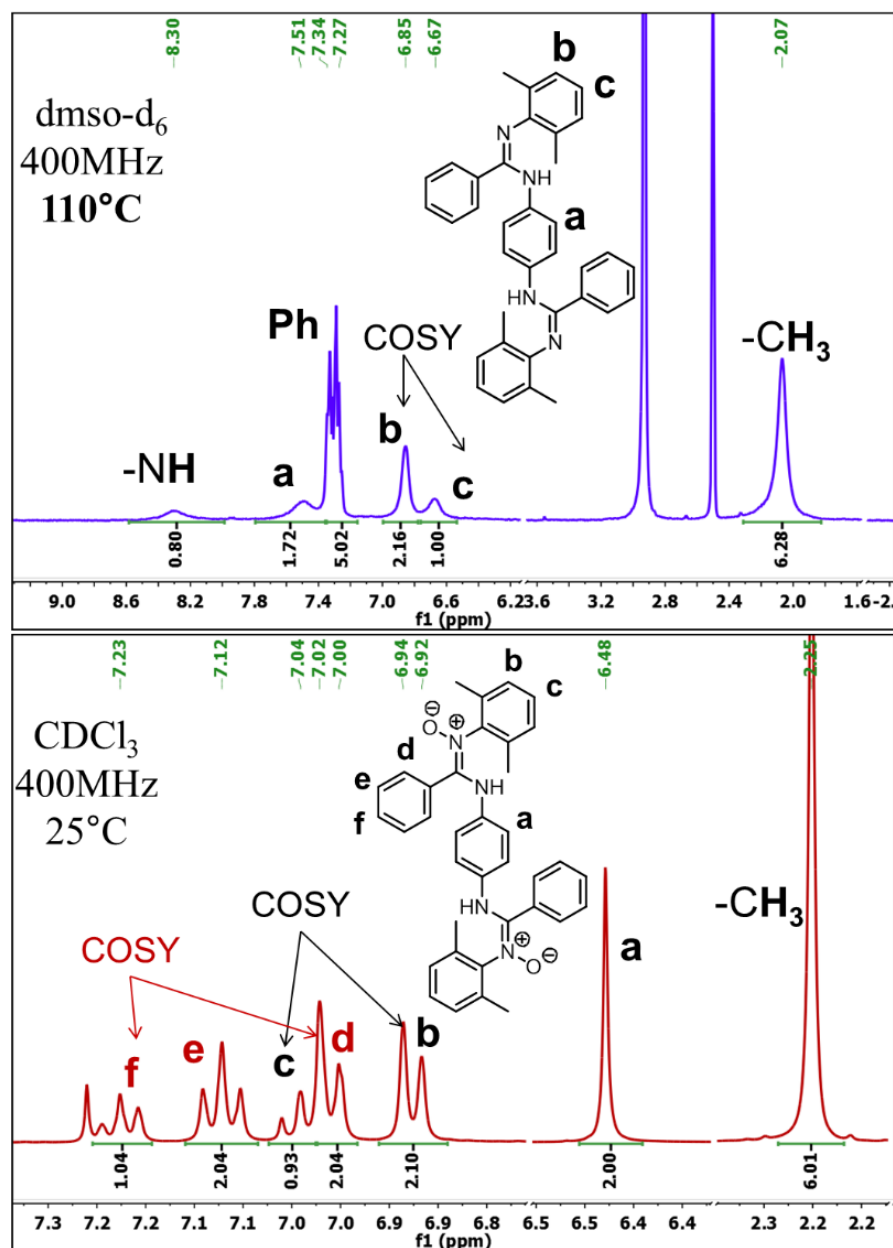

**Fig. S14.** <sup>1</sup>H NMR spectrum (400 MHz) of **bis-amidine (2)** in DMSO-*d*<sub>6</sub> at 110 °C (top) and **bis-AMOx (3)** in CDCl<sub>3</sub> at 25 °C (bottom) with proton resonance assignments.

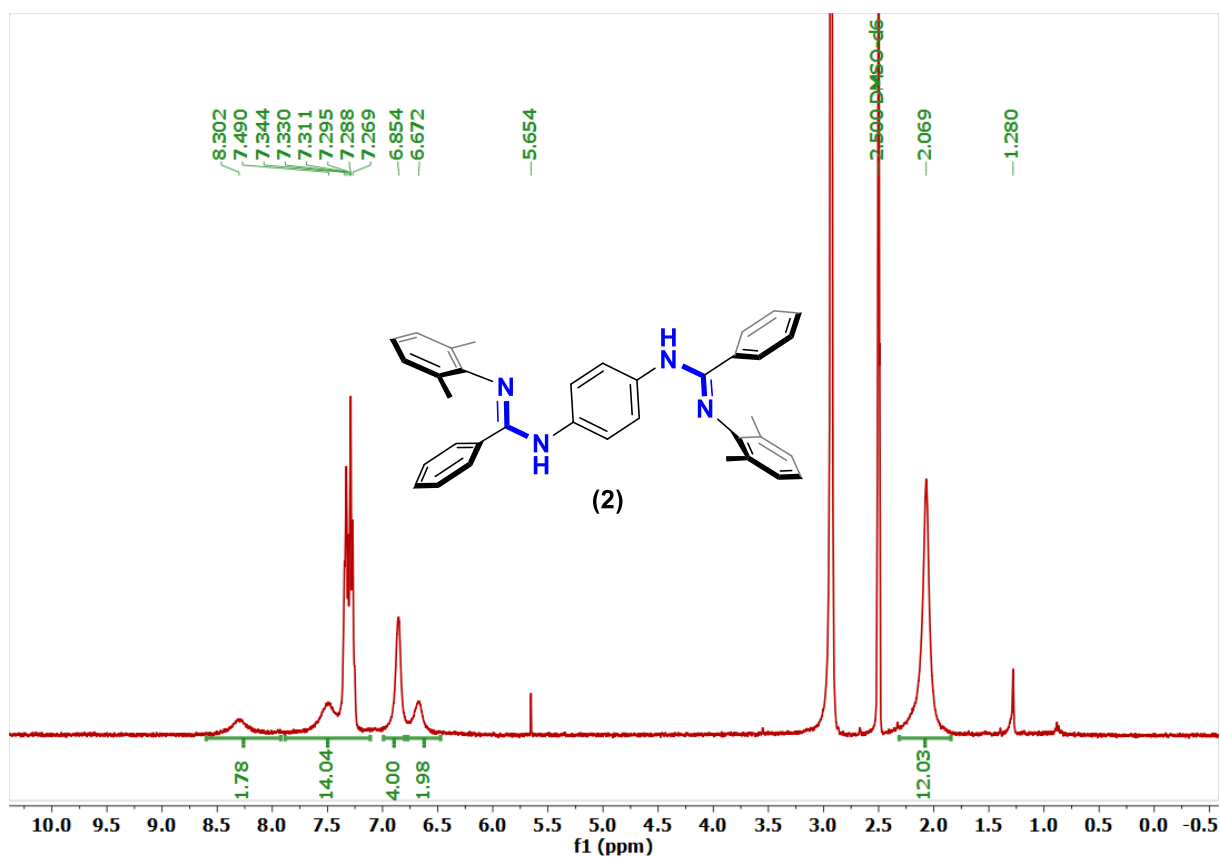

Fig. S15.  $^1\text{H}$  NMR spectrum (400 MHz) of bis-amidine (2) in  $\text{DMSO-}d_6$  at  $110\text{ }^\circ\text{C}$ .

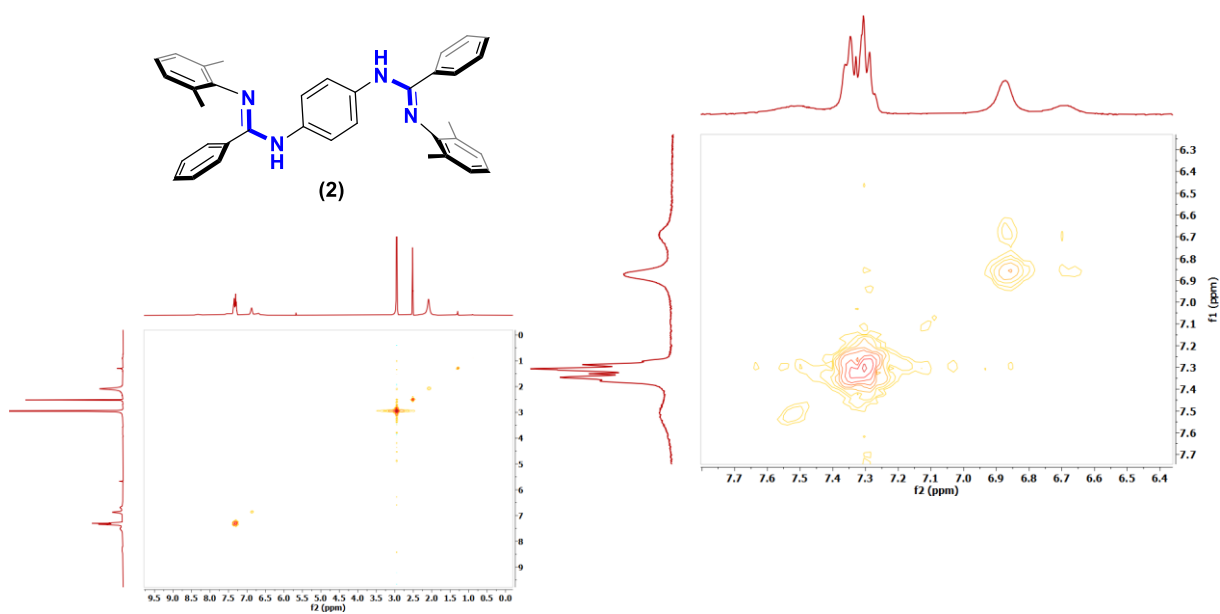

Fig. S16. COSY NMR spectrum (400 MHz) of bis-amidine (2) in  $\text{DMSO-}d_6$  at  $110\text{ }^\circ\text{C}$ .

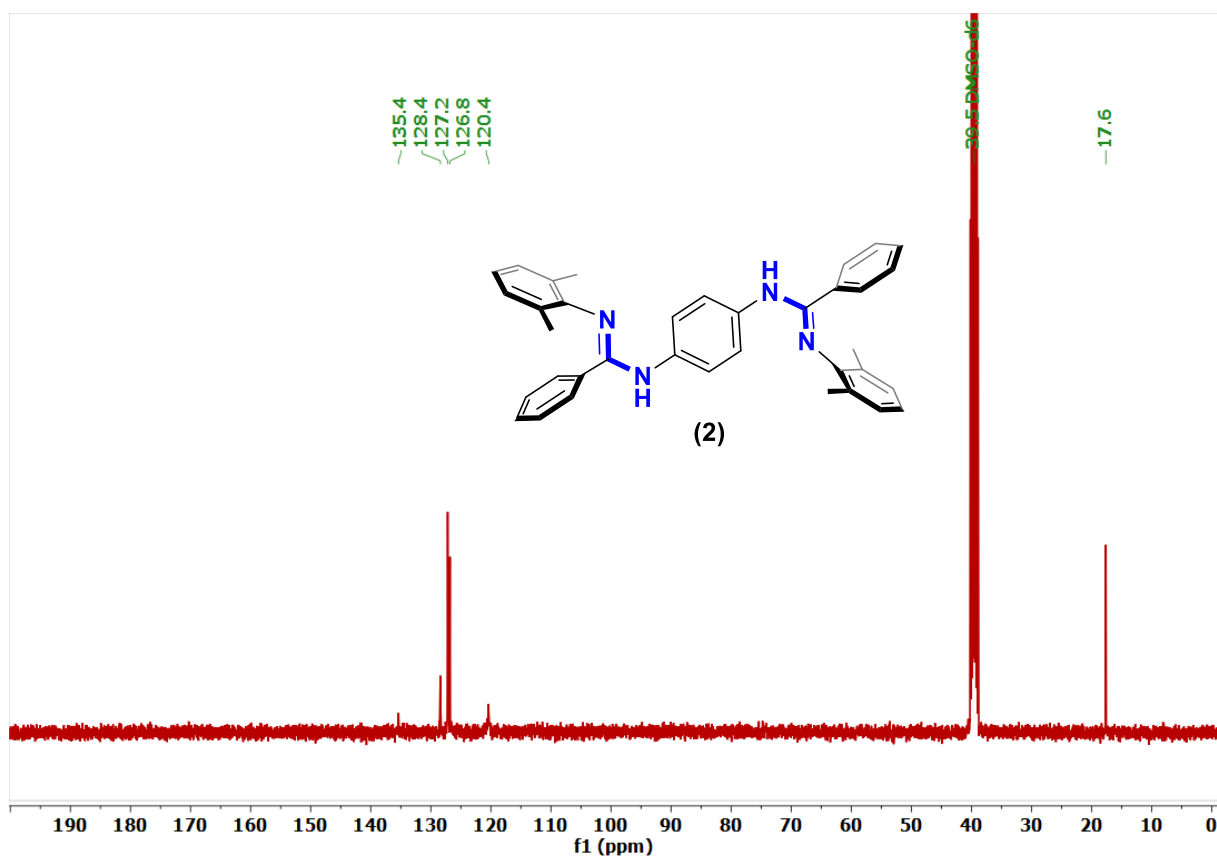

Fig. S17.  $^{13}\text{C}$  NMR spectrum (101 MHz) of bis-amidine (2) in  $\text{DMSO-}d_6$  at  $110\text{ }^\circ\text{C}$ .

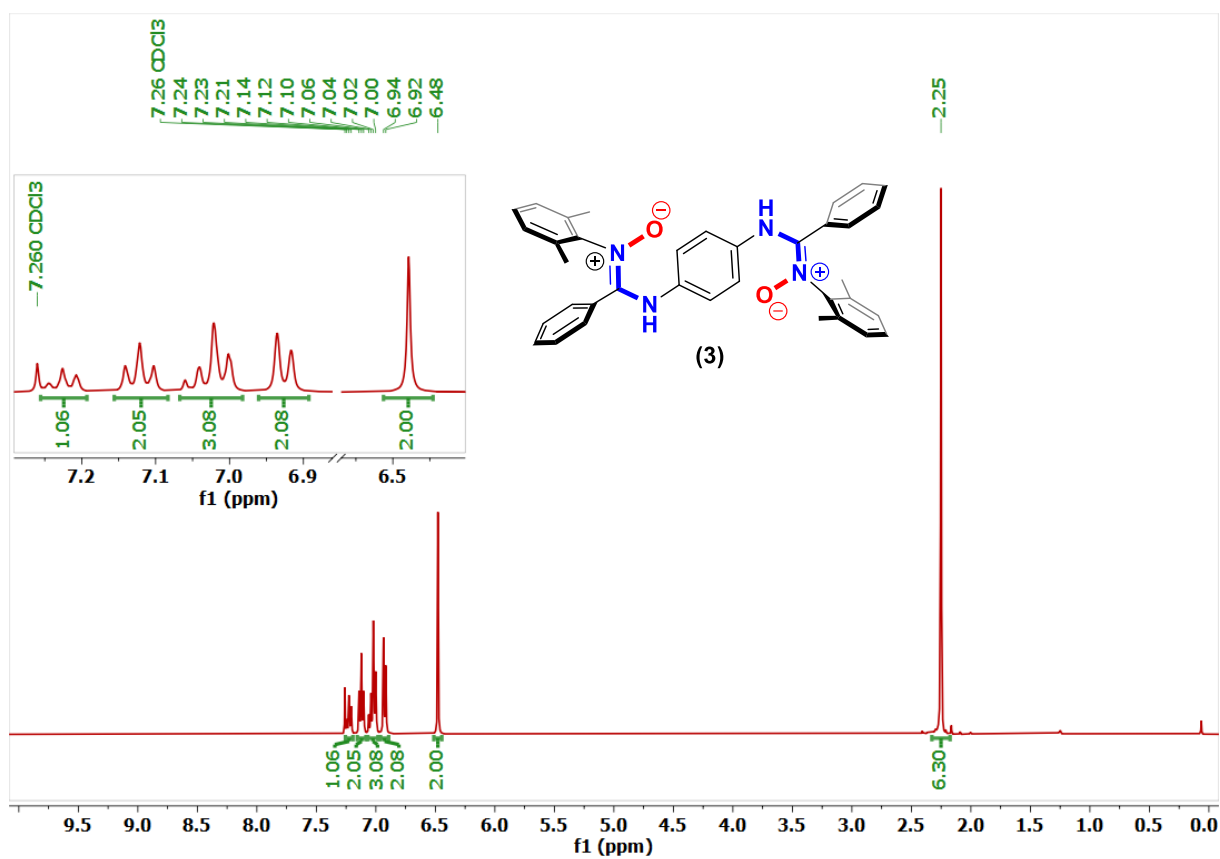

Fig. S18.  $^1\text{H}$  NMR spectrum (400 MHz) of bis-AMOX (3) in  $\text{CDCl}_3$  at  $25\text{ }^\circ\text{C}$ .

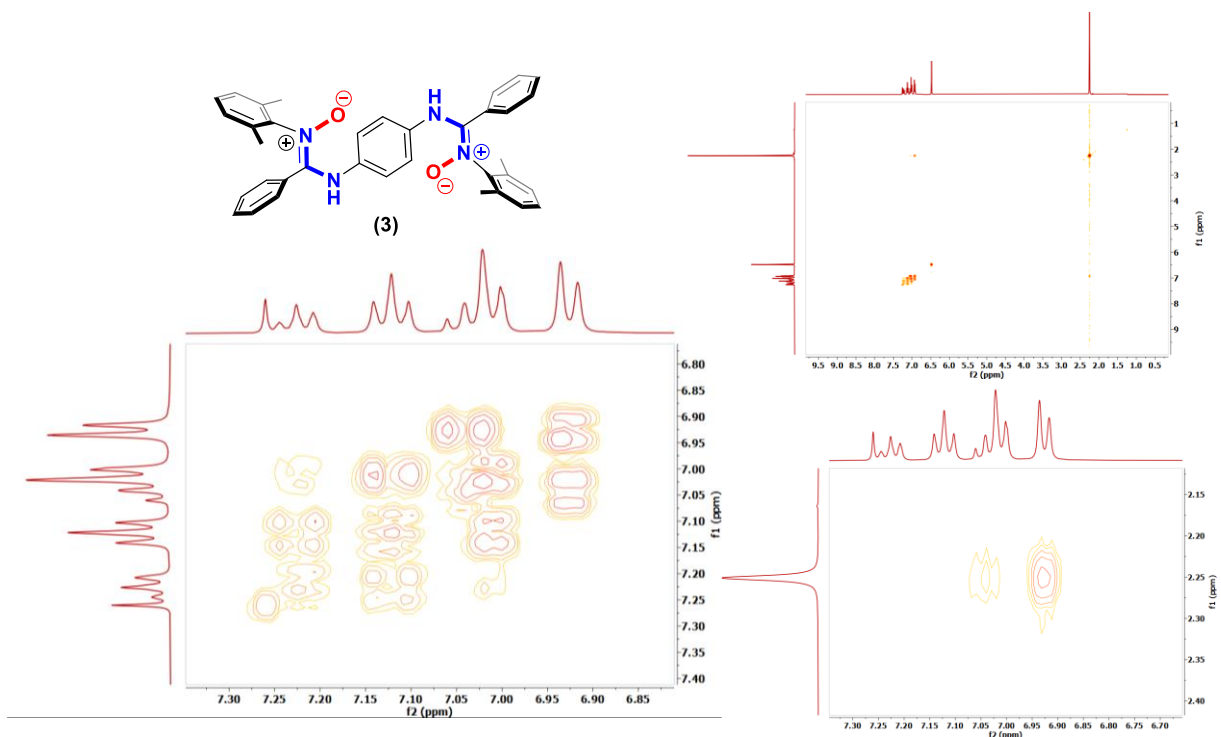

Fig. S19. COSY NMR spectrum (400 MHz) of bis-AMOX (**3**) in  $\text{CDCl}_3$  at 25 °C.

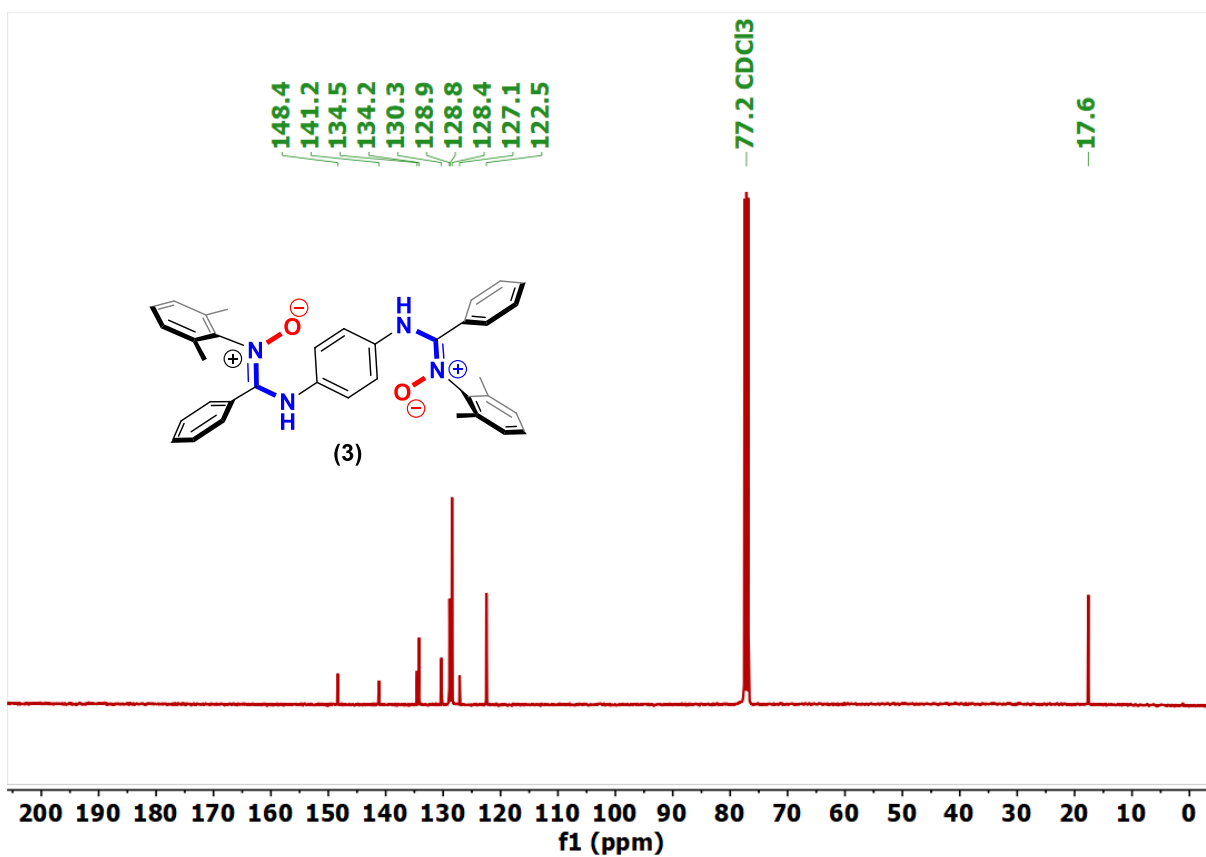

Fig. S20.  $^{13}\text{C}$  NMR spectrum (101 MHz) of bis-AMOX (**3**) in  $\text{CDCl}_3$  at 25 °C.

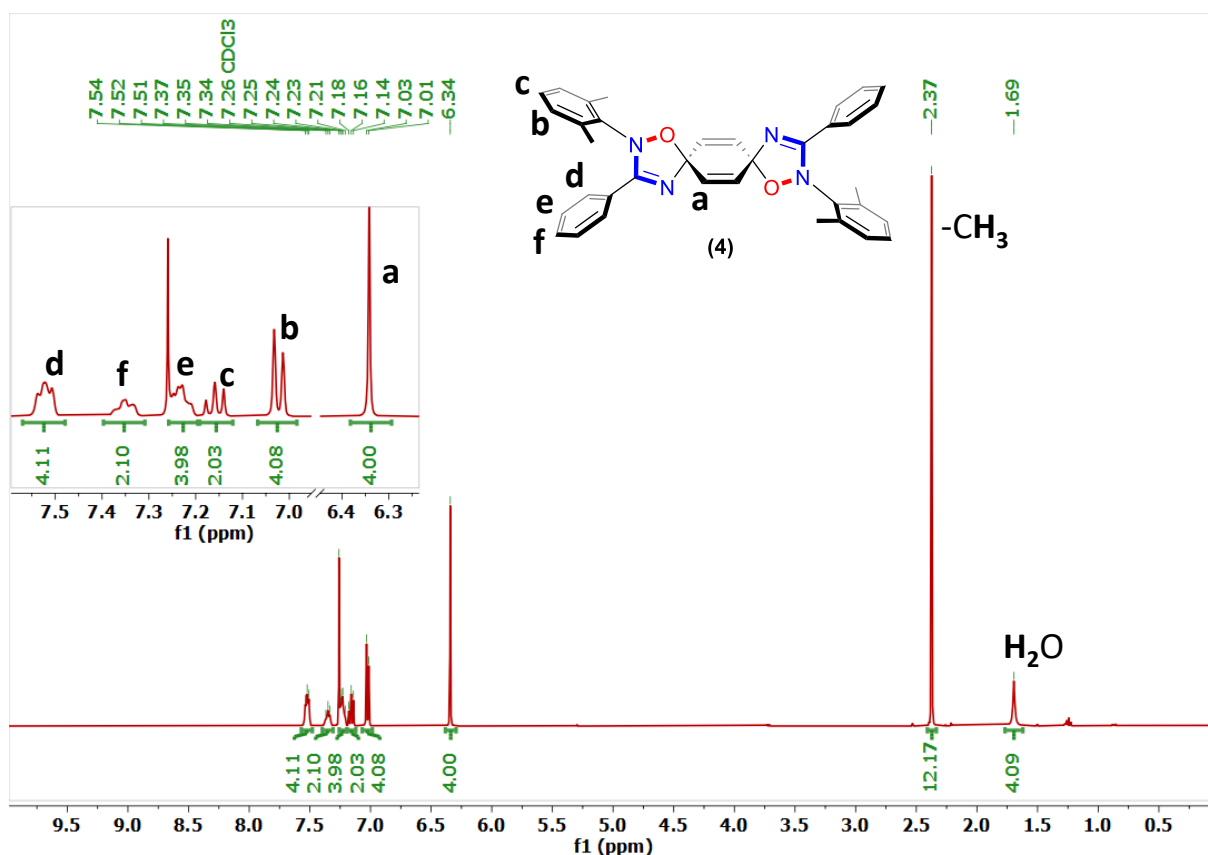

**Fig. S21.** <sup>1</sup>H NMR spectrum (400 MHz) of oxidized bis-AMOX (**4**) in CDCl<sub>3</sub> at 25 °C with proton resonances assignment. The presence of signals corresponding to water proton resonances at 1.69 ppm and the value of their integration (4H) confirm the results obtained by C/H/N elemental analysis indicating the formula 4·2H<sub>2</sub>O.

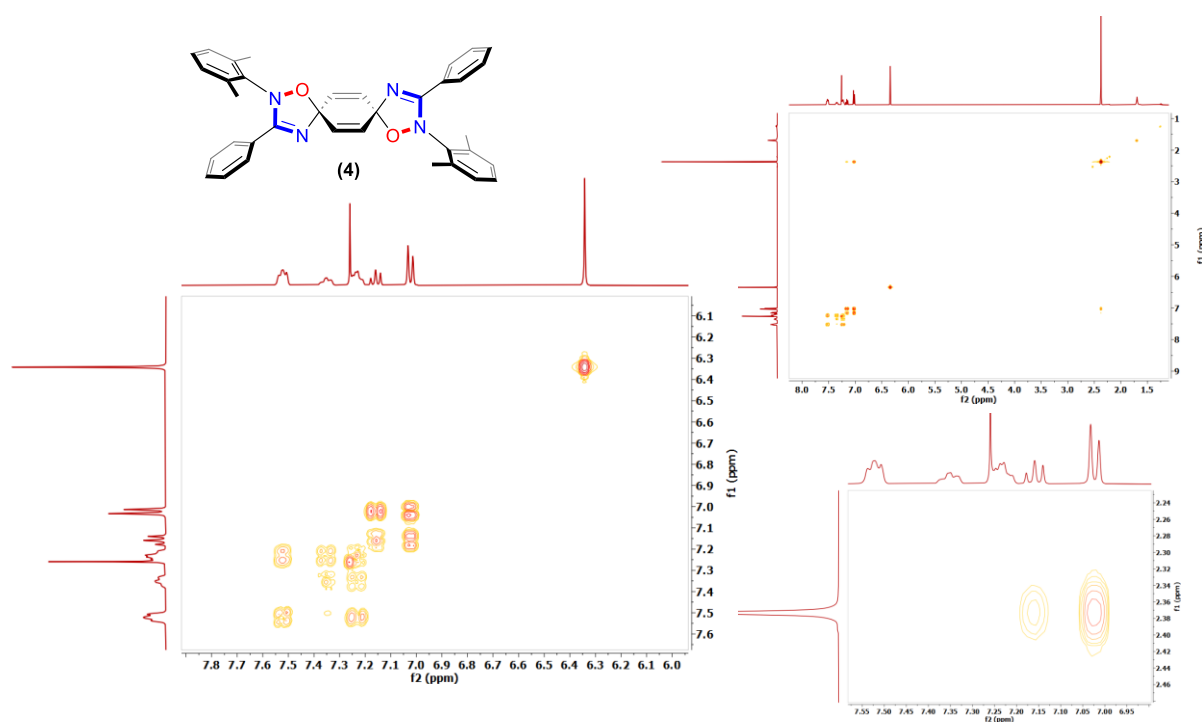

**Fig. S22.** COSY NMR spectrum (400 MHz) of oxidized bis-AMOX (**4**) in CDCl<sub>3</sub> at 25 °C.

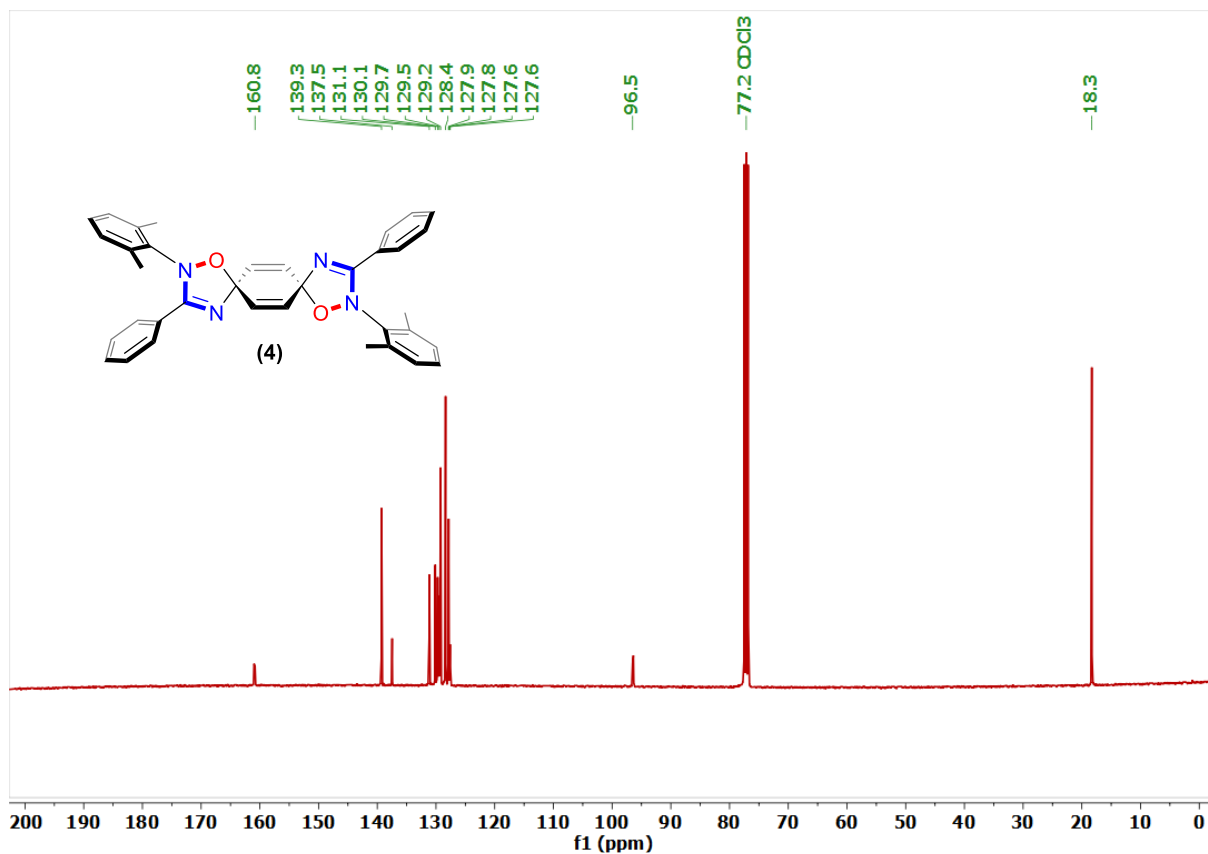

Fig. S23.  $^{13}\text{C}$  NMR spectrum (101 MHz) of oxidized bis-AMOX (4) in  $\text{CDCl}_3$  at 25 °C.

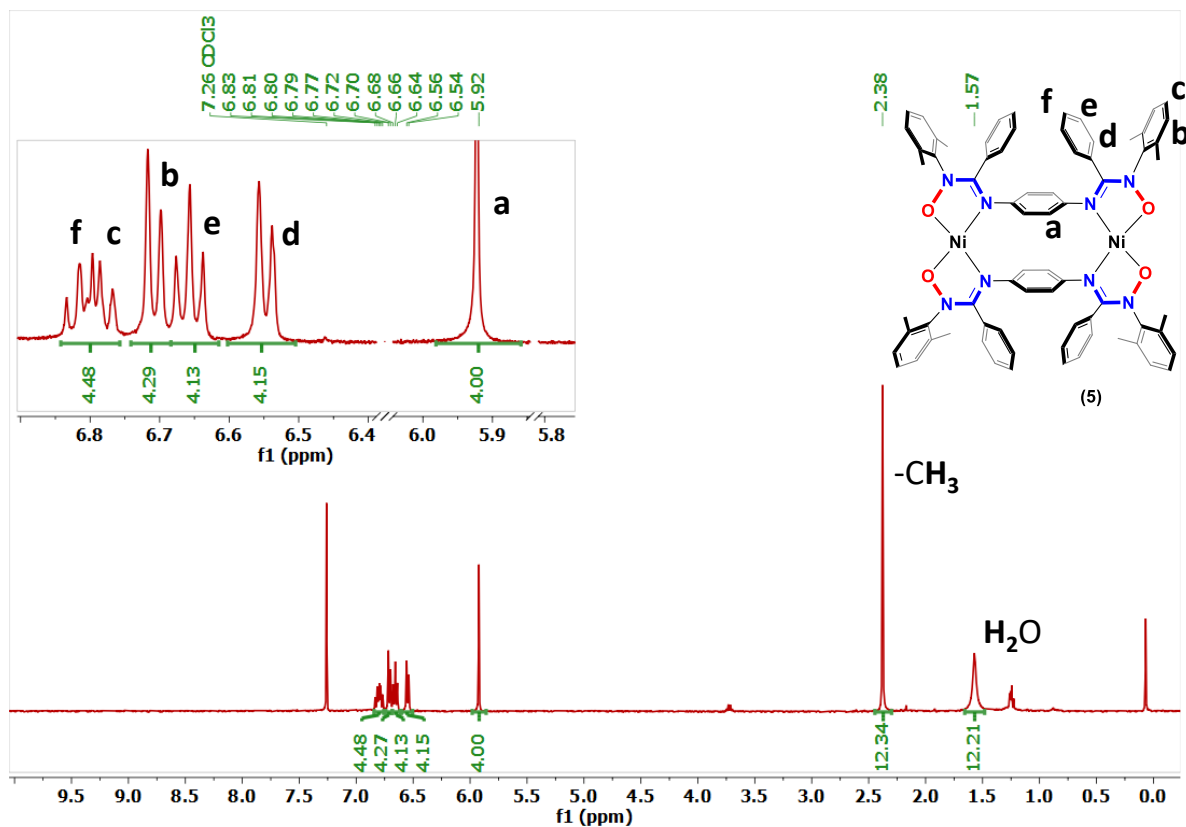

Fig. S24.  $^1\text{H}$  NMR spectrum (400 MHz) of Ni(II) bis-AMOX coordination dimer (5) in  $\text{CDCl}_3$  at 25 °C with proton resonances assignment.

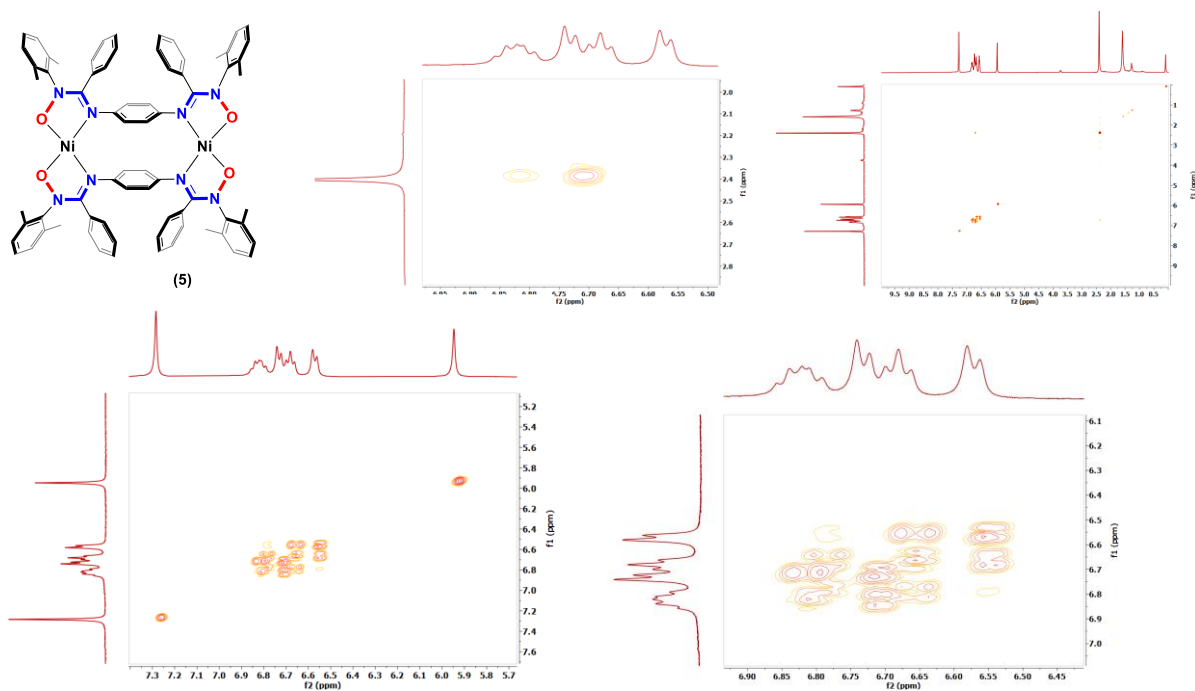

**Fig. S25.** COSY NMR spectrum (400 MHz) of Ni(II) bis-AMOX coordination dimer (**5**) in CDCl<sub>3</sub> at 25 °C.

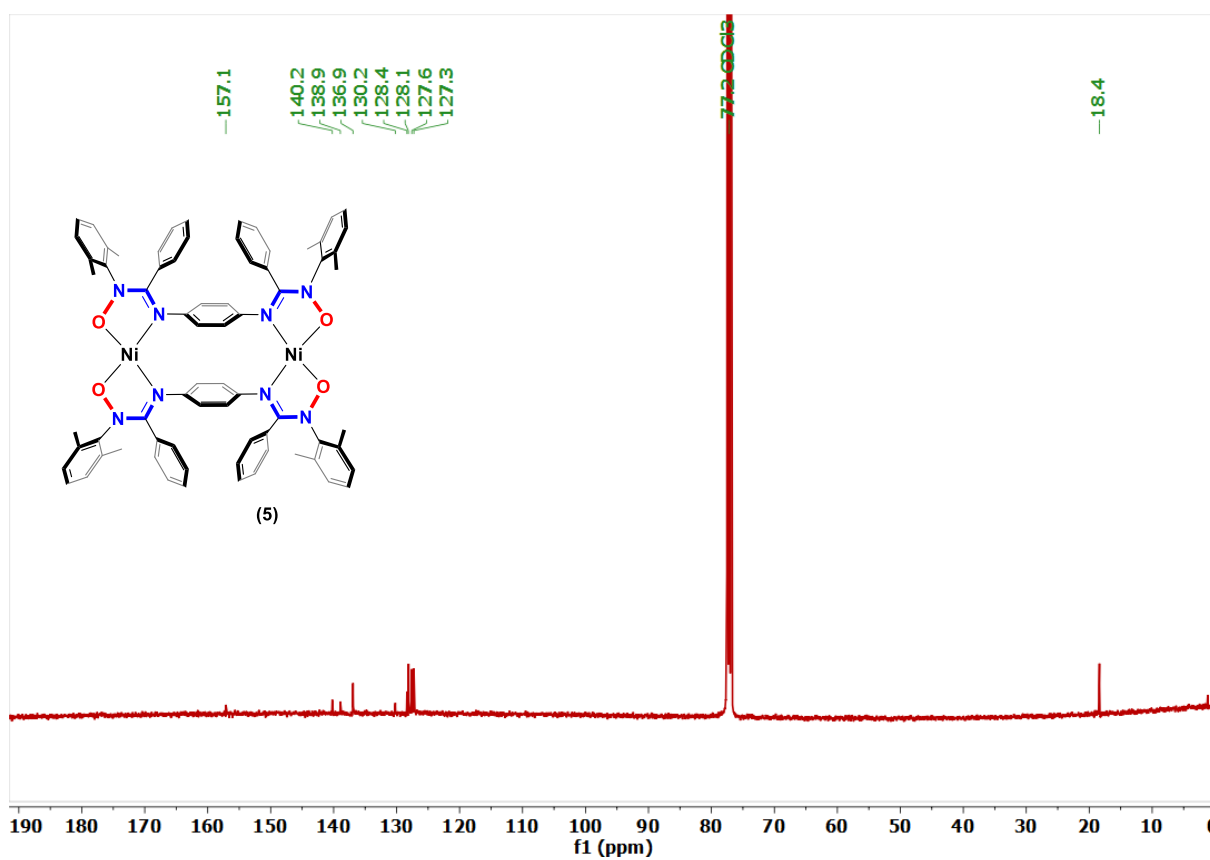

**Fig. S26.** <sup>13</sup>C NMR spectrum (101 MHz) of Ni(II) bis-AMOX coordination dimer (**5**) in CDCl<sub>3</sub> at 25 °C.

## 6. X-ray Diffraction Measurements and the Solid State Structure Determination

Crystallographic data for **3** and **4** were collected at 150 K from single crystals mounted on a loop fiber. Data were collected using a Bruker Microstar diffractometer equipped with a Platinum 135 CCD Detector, a Helios optics and a Kappa goniometer. The crystal-to-detector distance was 3.8 cm, and the data collection was carried out in 512 x 512 pixel mode. The initial unit cell parameters were determined by a least-squares fit of the angular setting of strong reflections, collected by a 110.0 degree scan in 110 frames over three different parts of the reciprocal space. Crystallographic data for **5** were collected at 100 K, using a Bruker Venture diffractometer equipped with a Photon 100 CMOS Detector, a Helios MX optics and a Kappa goniometer. The crystal-to-detector distance was 4.0 cm, and the data collection was carried out in 1024 x 1024 pixel mode. Crystallographic data for **6** were collected at 100 K, using a Bruker smart diffractometer equipped with an APEX II CCD Detector, an Incoatec IMuS source and a Quazar MX mirror. The crystal-to-detector distance was 4.0 cm, and the data collection was carried out in 512 x 512 pixel mode. The initial unit cell parameters were determined by a least-squares fit of the angular setting of strong reflections, collected by a 180.0 degree scan in 180 frames over three different parts of the reciprocal space. For data collection, determination of cell parameters, cell refinement, and data reduction, *APEX2* and *SAINTE* (Bruker, 2009 and Bruker, 2013) were used.<sup>9</sup> Absorption corrections were applied using *SADABS* (Bruker 2014).<sup>10</sup> Employing *OLEX2* (Dolomanov *et al.*, 2009),<sup>11</sup> the structure solutions were performed using direct methods with *SHELXS97* or *SHELXT* Intrinsic Phasing (Sheldrick, 2008; Sheldrick, 2015 )<sup>12</sup> and refined on  $F^2$  by full-matrix least squares using *SHELXL2014* (Sheldrick, 2008; Sheldrick, 2015).<sup>12</sup> *OLEX2* (Dolomanov *et al.*, 2009),<sup>11</sup> *ORTEP-3 for Windows* (Farrugia, 2012),<sup>13</sup> Mercury,<sup>14</sup> and POV-ray (2013)<sup>15</sup> were used for molecular graphics. The material was prepared for publication using *PLATON* (Spek, 2009),<sup>16</sup> Mercury,<sup>14</sup> and *publCIF* (Westrip, 2010).<sup>17</sup>

For all the structures presented herein, unless otherwise stated, all non-H atoms were refined by full-matrix least-squares with anisotropic displacement parameters. The H-atoms were included in calculated positions and treated as riding atoms: aromatic C–H 0.95 Å, methyl C–H 0.98 Å, with  $U_{\text{iso}}(\text{H}) = k \times U_{\text{eq}}(\text{parent C-atom})$ , where  $k = 1.2$  for the aromatic H-atoms and 1.5 for the methyl H-atoms. Unless mentioned differently, all the H-atoms connected to heteroatoms (N and O atoms) were located from the difference Fourier map and they were freely refined.

Crystal data and structure refinement details for compounds **3**, **4**, **5**, and **6** are summarized in Table S1. Their solid-state structures are illustrated in Figures 2 and 3 (article) and Fig. S27-S30. Crystallographic data for **3**, **4**, **5**, and **6** were deposited in CCDC.<sup>18</sup> The corresponding CCDC numbers are given in Table S1. Validation of the crystallographic information files (cifs) with the checkCIF/ PLATON routine was performed, returning only level C and G alerts. The comments to these alerts are included in the CIFs of the corresponding compounds.

**Bis-AMOX (3).** X-ray quality yellow crystals (plates) were obtained by slow diffusion of hexane into a DCM solution of the compound at r. t. A large K value in the Analysis of Variance is obtained for this structure (2.71). However, the place for the high values of K is in the lowest-intensity bin in the table. Therefore, large K value is most probably due to overestimated  $F_o$ , as most of area detector integration programs are slightly underestimating the background.

**Oxidized bis-AMOX (4).** X-ray quality pale yellow/colourless single crystals (blocks) of **4** were formed at r. t., by diffusion of hexane into a DCM solution of the compound. There aren't any specific comments regarding the resolution and the refinement of this structure.

**Ni(II) bis-AMOX coordination dimer (5).** X-ray quality yellow/brown single crystals (needles) of **5** were formed in aqueous EtOH, at 4 °C. Its solid-state structure contains co-crystallized EtOH molecules (2.5 ethanol molecules for one molecule of compound). PART -1 instruction was used to model the solvent molecules disordered over a symmetry element and AFIX 83 was used for calculating the position of H-atom part of the -OH group in the disordered co-crystallized EtOH. The H-atoms connected to the N atoms and those part of the -OH group in EtOH molecules which don't present disorder were located from the difference Fourier map and they were freely refined. SADI/ SIMU were also employed in modelling the disordered atoms. The weight second parameter is unusually large for **5** (16.56), which can indicate twinning. No twin law was detected with TwinRotMat routine from *PLATON* (Spek, 2009),<sup>16</sup> nor was identified upon inspection of the diffraction pattern in *RLATT* (Bruker, 2013)<sup>9</sup> or upon checking for non-merohedral twinning using *CELL\_NOW* (Bruker 2014).<sup>10</sup>

**Zn(II) bis-AMOX coordination polymer (6).** Single crystals (very fine yellow needles) were formed by slow evaporation of a hot toluene solution of **6**. Its solid-state structure was obtained from the best available crystal, which unfortunately was poor quality, resulting in mediocre overall quality of the data set. Co-crystallized disordered solvent molecules (toluene) are also present in the structure. They were modeled using DFIX/ DANG/ FLAT/ SADI/ DELU/ SIMU/ RIGU instructions. The weight first parameter is unusually large for **6** (0.15), which can indicate twinning. No twin law was detected with TwinRotMat routine from *PLATON* (Spek, 2009),<sup>16</sup> nor was identified upon inspection of the diffraction pattern in *RLATT* (Bruker, 2013)<sup>9</sup> or upon checking for non-merohedral twinning using *CELL\_NOW* (Bruker 2014).<sup>10</sup>

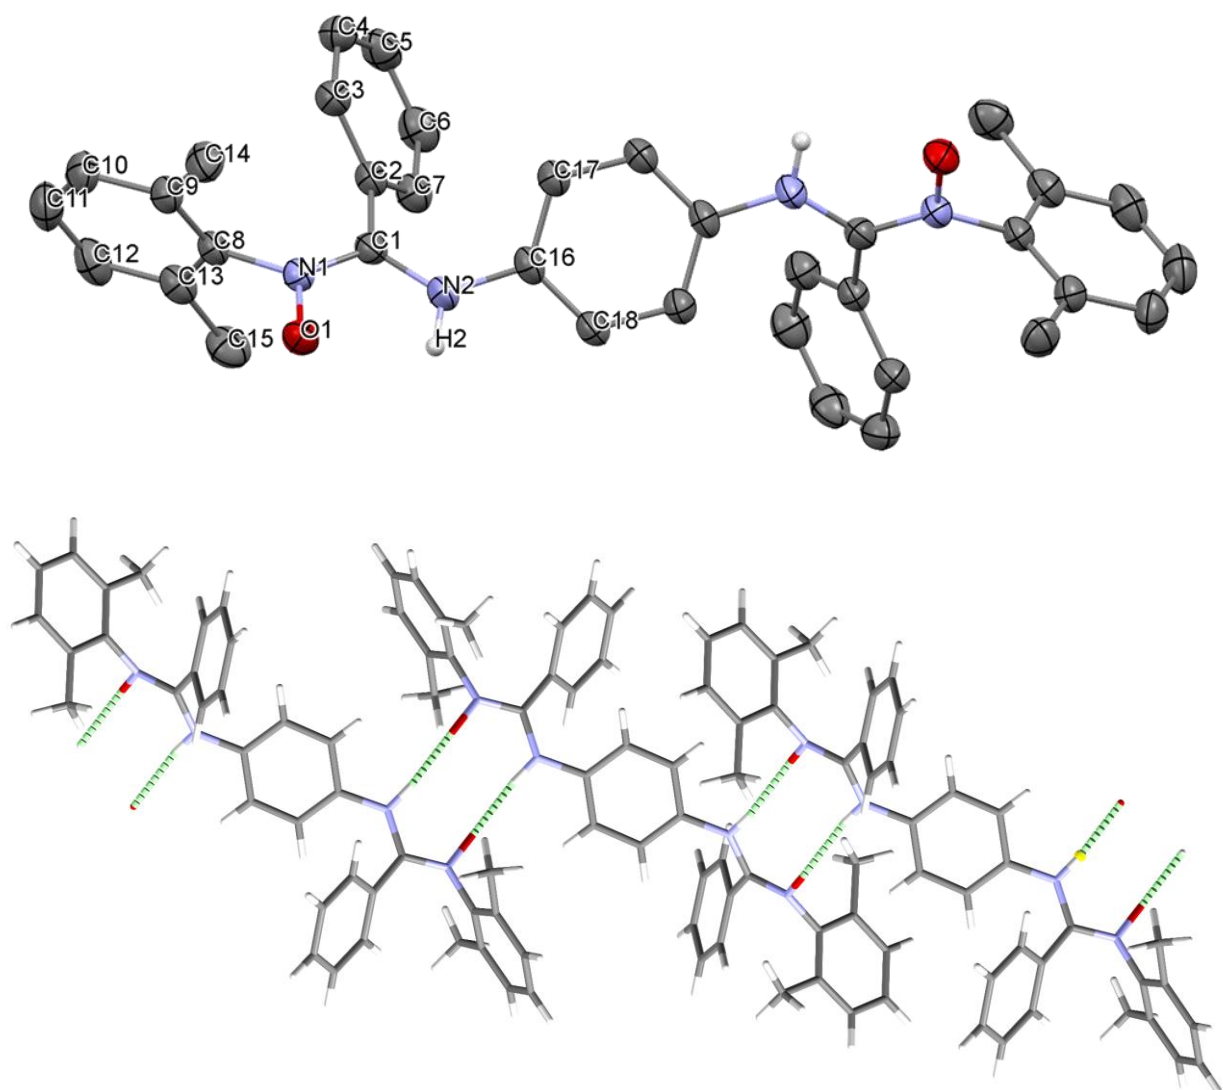

**Fig. S27.** The solid-state structure of **bis-AMOX (3)**: ORTEP view (ellipsoids at 50% probability level) with labelled atoms (symmetry code:  $3/2-x, +y, 3/2-z$ ) – C–H atoms were removed for clarity (top); H-bonding pattern (bottom) – cyclic dimers *via* N–H $\cdots$ O ( $d = 1.90(3)$  Å) bonds.

**Table S1.** Crystal data and structure refinement details for compounds **bis-AMOX (3)**, **oxidized bis-AMOX (4)**, **Ni(II) bis-AMOX coordination dimer (5)**, and **Zn(II) bis-AMOX coordination polymer (6)**

| Compound                                    | <b>3</b>                                                         | <b>4</b>                                                         | <b>5</b>                                                                                                                  | <b>6</b>                                                                                                   |
|---------------------------------------------|------------------------------------------------------------------|------------------------------------------------------------------|---------------------------------------------------------------------------------------------------------------------------|------------------------------------------------------------------------------------------------------------|
| CCDC no.                                    | 2322646                                                          | 2322647                                                          | 2322741                                                                                                                   | 2322755                                                                                                    |
| Empirical formula                           | C <sub>36</sub> H <sub>34</sub> N <sub>4</sub> O <sub>2</sub>    | C <sub>36</sub> H <sub>32</sub> N <sub>4</sub> O <sub>2</sub>    | C <sub>72</sub> H <sub>64</sub> N <sub>8</sub> Ni <sub>2</sub> O <sub>4</sub><br>• 2.5(CH <sub>3</sub> CH <sub>2</sub> O) | C <sub>36</sub> H <sub>32</sub> N <sub>4</sub> O <sub>2</sub> Zn<br>• 2(CH <sub>3</sub> CH <sub>2</sub> O) |
| Formula weight                              | 554.67                                                           | 552.65                                                           | 1337.90                                                                                                                   | 802.29                                                                                                     |
| Temperature/K                               | 100                                                              | 150                                                              | 105                                                                                                                       | 100                                                                                                        |
| Crystal system                              | Monoclinic                                                       | Monoclinic                                                       | Trigonal                                                                                                                  | Monoclinic                                                                                                 |
| Space group                                 | P2/n                                                             | P2 <sub>1</sub> /n                                               | R-3                                                                                                                       | P2 <sub>1</sub> /n                                                                                         |
| a/Å                                         | 13.9746(11)                                                      | 15.1954(10)                                                      | 38.0510(13)                                                                                                               | 9.5906(6)                                                                                                  |
| b/Å                                         | 6.6772(6)                                                        | 6.3722(4)                                                        | 38.0510(13)                                                                                                               | 22.2020(11)                                                                                                |
| c/Å                                         | 17.1658(14)                                                      | 15.5411(10)                                                      | 12.1896(5)                                                                                                                | 20.2657(12)                                                                                                |
| α/°                                         | 90                                                               | 90                                                               | 90                                                                                                                        | 90                                                                                                         |
| β/°                                         | 108.555(3)                                                       | 101.589(3)                                                       | 90                                                                                                                        | 99.741(4)                                                                                                  |
| γ/°                                         | 90                                                               | 90                                                               | 120                                                                                                                       | 90                                                                                                         |
| Volume/Å <sup>3</sup>                       | 1518.5(2)                                                        | 1474.14(16)                                                      | 15284.5(12)                                                                                                               | 4253.0(4)                                                                                                  |
| Z                                           | 2                                                                | 2                                                                | 9                                                                                                                         | 4                                                                                                          |
| ρ <sub>calc</sub> /cm <sup>3</sup>          | 1.213                                                            | 1.245                                                            | 1.308                                                                                                                     | 1.253                                                                                                      |
| μ/mm <sup>-1</sup>                          | 0.600                                                            | 0.618                                                            | 3.409                                                                                                                     | 1.140                                                                                                      |
| F(000)                                      | 588.0                                                            | 584.0                                                            | 6345.0                                                                                                                    | 1688                                                                                                       |
| Crystal size/mm <sup>3</sup>                | 0.130 × 0.104 × 0.026                                            | 0.18 × 0.08 × 0.08                                               | 0.12 × 0.06 × 0.04                                                                                                        | 0.210 × 0.042 × 0.021                                                                                      |
| Radiation                                   | CuKα<br>(λ = 1.54178)                                            | CuKα<br>(λ = 1.54178)                                            | GaKα<br>(λ = 1.34139)                                                                                                     | CuKα<br>(λ = 1.54178)                                                                                      |
| 2θ range for data collection/°              | 7.138 to 139.554                                                 | 7.424 to 139.478                                                 | 6.726 to 121.426                                                                                                          | 5.952 to 142.516                                                                                           |
| Index ranges                                | -16 ≤ h ≤ 16,<br>-7 ≤ k ≤ 8,<br>-20 ≤ l ≤ 20                     | -18 ≤ h ≤ 15,<br>-7 ≤ k ≤ 7,<br>-18 ≤ l ≤ 18                     | -49 ≤ h ≤ 48,<br>-49 ≤ k ≤ 48,<br>-15 ≤ l ≤ 15                                                                            | -11 ≤ h ≤ 10,<br>-26 ≤ k ≤ 27,<br>-24 ≤ l ≤ 24                                                             |
| Reflections collected                       | 62523                                                            | 31255                                                            | 97569                                                                                                                     | 56416                                                                                                      |
| Independent reflections                     | 2867<br>[R <sub>int</sub> = 0.0574, R <sub>sigma</sub> = 0.0185] | 2771<br>[R <sub>int</sub> = 0.0482, R <sub>sigma</sub> = 0.0240] | 7814<br>[R <sub>int</sub> = 0.1004, R <sub>sigma</sub> = 0.0496]                                                          | 8189<br>[R <sub>int</sub> = 0.1054, R <sub>sigma</sub> = 0.0656]                                           |
| Data/restraints/parameters                  | 2867/0/196                                                       | 2771/0/192                                                       | 7814/14/449                                                                                                               | 8189 / 165 / 520                                                                                           |
| Goodness-of-fit on F <sup>2</sup>           | 1.071                                                            | 1.044                                                            | 1.023                                                                                                                     | 1.030                                                                                                      |
| Final R indexes [I >= 2σ (I)]               | R <sub>1</sub> = 0.0547, wR <sub>2</sub> = 0.1588                | R <sub>1</sub> = 0.0360, wR <sub>2</sub> = 0.0992                | R <sub>1</sub> = 0.0387, wR <sub>2</sub> = 0.0899                                                                         | R <sub>1</sub> = 0.0742, wR <sub>2</sub> = 0.1925                                                          |
| Final R indexes [all data]                  | R <sub>1</sub> = 0.0581, wR <sub>2</sub> = 0.1627                | R <sub>1</sub> = 0.0384, wR <sub>2</sub> = 0.1018                | R <sub>1</sub> = 0.0602, wR <sub>2</sub> = 0.0995                                                                         | R <sub>1</sub> = 0.1143, wR <sub>2</sub> = 0.2256                                                          |
| Largest diff. peak/hole / e Å <sup>-3</sup> | 0.44/-0.21                                                       | 0.19/-0.17                                                       | 0.36/-0.22                                                                                                                | 1.17/-1.23                                                                                                 |

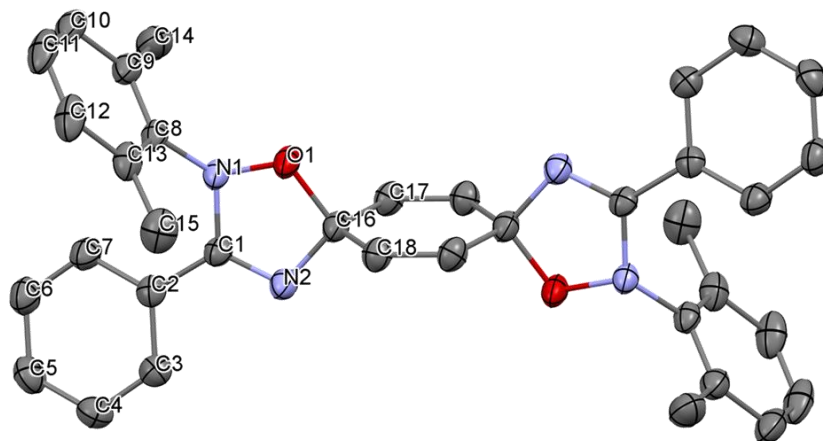

**Fig. S28.** The solid-state structure of **oxidized bis-AMOX (4)**: ORTEP view (ellipsoids at 50% probability level) with labelled atoms (symmetry code:  $-x, -y, -z$ ). Hydrogen atoms were removed for clarity.

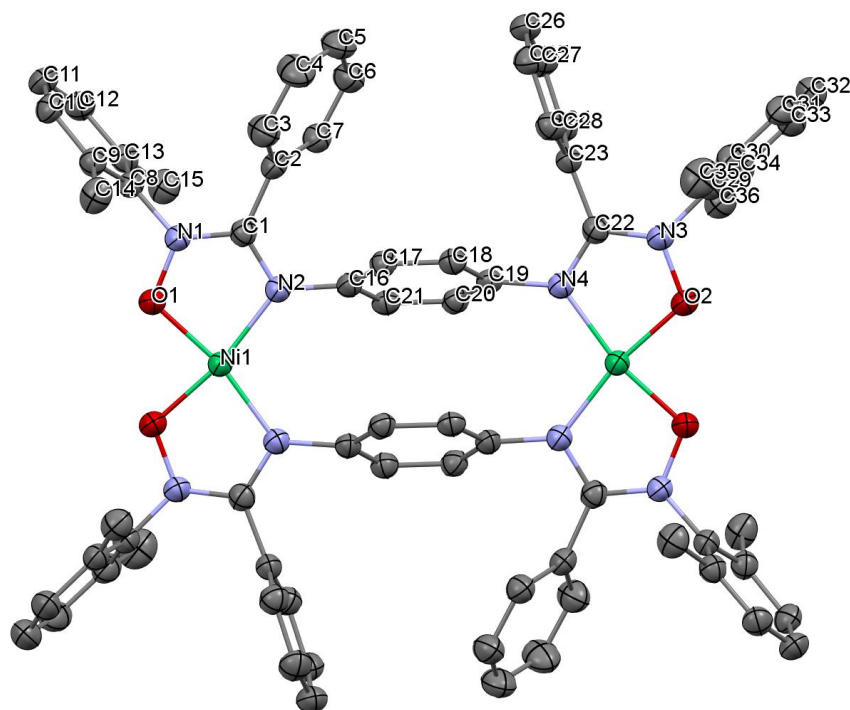

**Fig. S29.** The solid-state structure of **Ni(II) bis-AMOX coordination dimer (5)**: ORTEP view (ellipsoids at 50% probability level) with labelled atoms (symmetry code:  $1-x, 1-y, 1-z$ ). Hydrogen atoms and co-crystallized solvent were removed for clarity.

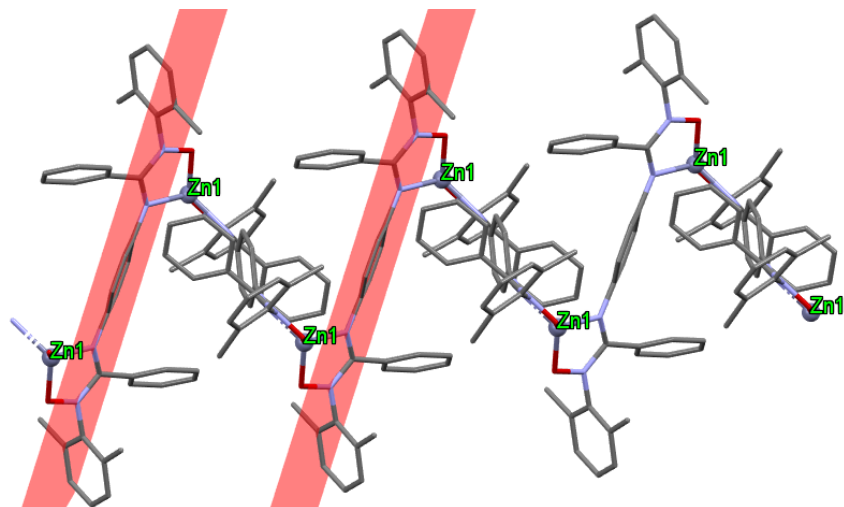

**Fig. S30.** The solid-state structure of **Zn(II) bis-AMOX coordination polymer (6)**: wireframe view. Hydrogen atoms and co-crystallized solvent were removed for clarity.

## 7. Electronic Spectra

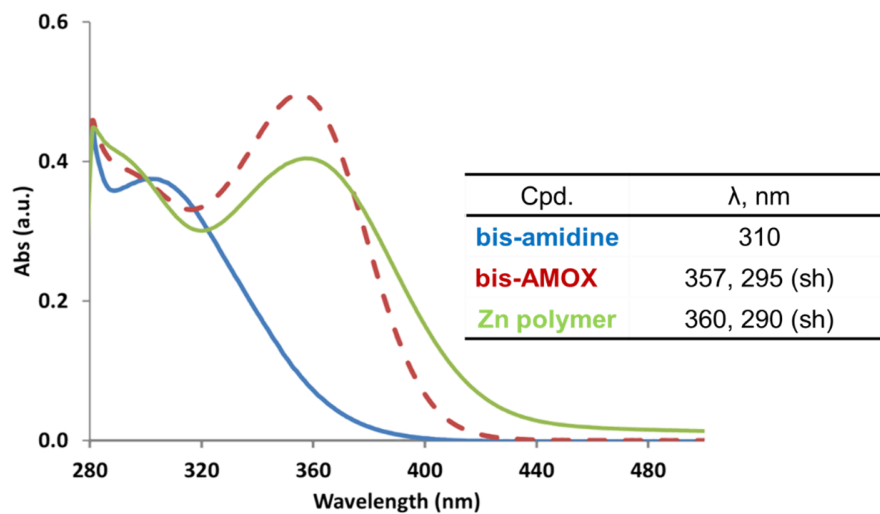

**Fig. S31.** Electronic spectra of the **Zn(II) metallopolymer (6)** (green), the *N*-bridged **bis-AMOX** ligand **(3)** (red), and the *N*-bridged **bis-amidine** precursor **(2)** (blue) (in toluene at r. t.).

## 8. Thermogravimetric Analysis

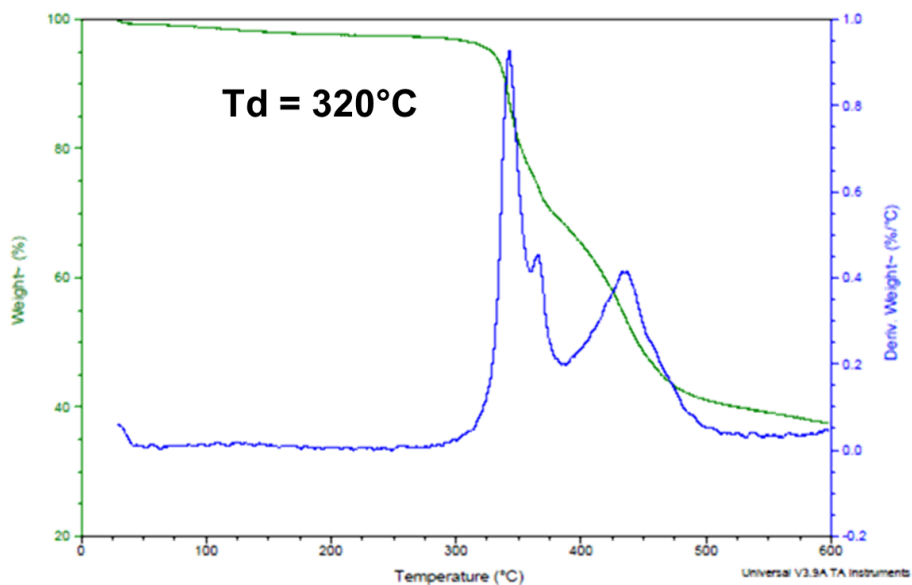

**Fig. S32.** TGA profile for the **Zn(II) metallopolymer (6)** ( $T_d$  calculated at 5% weight loss).

## 9. Atomic Coordinates Tables for DFT Optimized Structures

**Table S2.** Atomic coordinates for DFT optimization of **dimer** structure (theory level: B3LYP/6,31-g(d,p), gas phase)

Standard orientation:

| Center Number | Atomic Number | Atomic Type | Coordinates (Angstroms) |           |           |
|---------------|---------------|-------------|-------------------------|-----------|-----------|
|               |               |             | X                       | Y         | Z         |
| 1             | 6             | 0           | -1.421624               | -1.832448 | 0.555619  |
| 2             | 6             | 0           | -0.693380               | -2.622227 | -0.350251 |
| 3             | 6             | 0           | 0.693411                | -2.622250 | -0.350194 |
| 4             | 6             | 0           | 1.421602                | -1.832500 | 0.555744  |
| 5             | 6             | 0           | 0.697107                | -1.065987 | 1.480742  |
| 6             | 6             | 0           | -0.697189               | -1.065960 | 1.480681  |
| 7             | 7             | 0           | -2.827139               | -1.698953 | 0.449111  |
| 8             | 7             | 0           | 2.827138                | -1.699031 | 0.449399  |
| 9             | 6             | 0           | 3.595252                | -2.749374 | 0.122717  |
| 10            | 7             | 0           | 4.726049                | -2.487713 | -0.550625 |
| 11            | 6             | 0           | 3.286937                | -4.145814 | 0.541202  |
| 12            | 6             | 0           | -3.595246               | -2.749311 | 0.122491  |
| 13            | 7             | 0           | -4.725967               | -2.487683 | -0.551003 |
| 14            | 6             | 0           | -3.287068               | -4.145693 | 0.541244  |

|    |    |   |           |           |           |
|----|----|---|-----------|-----------|-----------|
| 15 | 8  | 0 | -4.980595 | -1.210348 | -0.965362 |
| 16 | 6  | 0 | 5.842389  | -3.371114 | -0.755719 |
| 17 | 8  | 0 | 4.980741  | -1.210355 | -0.964863 |
| 18 | 6  | 0 | -5.842362 | -3.371032 | -0.756023 |
| 19 | 6  | 0 | -2.844314 | -4.367816 | 1.855955  |
| 20 | 6  | 0 | -2.551483 | -5.656290 | 2.295952  |
| 21 | 6  | 0 | -2.684193 | -6.741365 | 1.427469  |
| 22 | 6  | 0 | -3.110257 | -6.528788 | 0.115872  |
| 23 | 6  | 0 | -3.411361 | -5.241247 | -0.325061 |
| 24 | 6  | 0 | 3.411133  | -5.241196 | -0.325338 |
| 25 | 6  | 0 | 3.109840  | -6.528789 | 0.115306  |
| 26 | 6  | 0 | 2.683682  | -6.741587 | 1.426840  |
| 27 | 6  | 0 | 2.551075  | -5.656685 | 2.295550  |
| 28 | 6  | 0 | 2.844095  | -4.368152 | 1.855841  |
| 29 | 6  | 0 | -6.672360 | -3.709105 | 0.325840  |
| 30 | 6  | 0 | -7.769555 | -4.541173 | 0.069883  |
| 31 | 6  | 0 | -8.046009 | -4.989739 | -1.218234 |
| 32 | 6  | 0 | -7.233908 | -4.599034 | -2.282529 |
| 33 | 6  | 0 | -6.123750 | -3.776965 | -2.073936 |
| 34 | 6  | 0 | 6.672232  | -3.709496 | 0.326177  |
| 35 | 6  | 0 | 7.769394  | -4.541586 | 0.070170  |
| 36 | 6  | 0 | 8.045985  | -4.989877 | -1.218018 |
| 37 | 6  | 0 | 7.234045  | -4.598875 | -2.282319 |
| 38 | 6  | 0 | 6.123910  | -3.776776 | -2.073683 |
| 39 | 6  | 0 | -6.419261 | -3.179727 | 1.715877  |
| 40 | 6  | 0 | -5.258805 | -3.328229 | -3.225675 |
| 41 | 6  | 0 | 5.259116  | -3.327786 | -3.225436 |
| 42 | 6  | 0 | 6.419021  | -3.180409 | 1.716305  |
| 43 | 30 | 0 | -3.773955 | 0.000003  | -0.000466 |
| 44 | 30 | 0 | 3.773876  | -0.000056 | -0.000132 |
| 45 | 6  | 0 | 1.421652  | 1.832500  | -0.555821 |
| 46 | 6  | 0 | 0.693476  | 2.622124  | 0.350239  |
| 47 | 6  | 0 | -0.693316 | 2.622151  | 0.350277  |
| 48 | 6  | 0 | -1.421566 | 1.832560  | -0.555750 |
| 49 | 6  | 0 | -0.697144 | 1.066183  | -1.480913 |
| 50 | 6  | 0 | 0.697152  | 1.066154  | -1.480948 |
| 51 | 7  | 0 | 2.827185  | 1.698985  | -0.449485 |
| 52 | 7  | 0 | -2.827098 | 1.699075  | -0.449338 |
| 53 | 6  | 0 | -3.595238 | 2.749362  | -0.122567 |
| 54 | 7  | 0 | -4.726189 | 2.487571  | 0.550470  |
| 55 | 6  | 0 | -3.286810 | 4.145908  | -0.540622 |
| 56 | 6  | 0 | 3.595333  | 2.749285  | -0.122750 |
| 57 | 7  | 0 | 4.726192  | 2.487546  | 0.550454  |
| 58 | 6  | 0 | 3.286976  | 4.145776  | -0.541032 |
| 59 | 8  | 0 | 4.980945  | 1.210131  | 0.964480  |
| 60 | 6  | 0 | -5.842508 | 3.370996  | 0.755613  |
| 61 | 8  | 0 | -4.981066 | 1.210094  | 0.964214  |
| 62 | 6  | 0 | 5.842533  | 3.370944  | 0.755586  |
| 63 | 6  | 0 | 3.411156  | 5.241042  | 0.325652  |
| 64 | 6  | 0 | 3.109823  | 6.528688  | -0.114811 |
| 65 | 6  | 0 | 2.683647  | 6.741654  | -1.426310 |
| 66 | 6  | 0 | 2.551061  | 5.656867  | -2.295170 |
| 67 | 6  | 0 | 2.844118  | 4.368282  | -1.855640 |
| 68 | 6  | 0 | -2.843862 | 4.368616  | -1.855162 |
| 69 | 6  | 0 | -2.550739 | 5.657267  | -2.294460 |
| 70 | 6  | 0 | -2.683347 | 6.741912  | -1.425430 |
| 71 | 6  | 0 | -3.109614 | 6.528744  | -0.113992 |

|     |   |   |           |           |           |
|-----|---|---|-----------|-----------|-----------|
| 72  | 6 | 0 | -3.411012 | 5.241034  | 0.326238  |
| 73  | 6 | 0 | 6.124146  | 3.776438  | 2.073579  |
| 74  | 6 | 0 | 7.234291  | 4.598520  | 2.282238  |
| 75  | 6 | 0 | 8.046148  | 4.989662  | 1.217927  |
| 76  | 6 | 0 | 7.769468  | 4.541530  | -0.070299 |
| 77  | 6 | 0 | 6.672297  | 3.709463  | -0.326329 |
| 78  | 6 | 0 | -6.672162 | 3.709696  | -0.326327 |
| 79  | 6 | 0 | -7.769318 | 4.541780  | -0.070283 |
| 80  | 6 | 0 | -8.046086 | 4.989759  | 1.217977  |
| 81  | 6 | 0 | -7.234337 | 4.598443  | 2.282307  |
| 82  | 6 | 0 | -6.124215 | 3.776333  | 2.073635  |
| 83  | 6 | 0 | 5.259447  | 3.327285  | 3.225340  |
| 84  | 6 | 0 | 6.418992  | 3.180520  | -1.716494 |
| 85  | 6 | 0 | -5.259634 | 3.326984  | 3.225410  |
| 86  | 6 | 0 | -6.418745 | 3.180955  | -1.716549 |
| 87  | 1 | 0 | -1.222508 | -3.199268 | -1.101322 |
| 88  | 1 | 0 | 1.222574  | -3.199308 | -1.101226 |
| 89  | 1 | 0 | 1.237184  | -0.440735 | 2.185930  |
| 90  | 1 | 0 | -1.237304 | -0.440684 | 2.185819  |
| 91  | 1 | 0 | -2.731936 | -3.522092 | 2.525651  |
| 92  | 1 | 0 | -2.217610 | -5.812223 | 3.317422  |
| 93  | 1 | 0 | -2.452754 | -7.745770 | 1.769606  |
| 94  | 1 | 0 | -3.207701 | -7.366215 | -0.568522 |
| 95  | 1 | 0 | -3.735775 | -5.086875 | -1.347155 |
| 96  | 1 | 0 | 3.735625  | -5.086633 | -1.347378 |
| 97  | 1 | 0 | 3.207201  | -7.366089 | -0.569256 |
| 98  | 1 | 0 | 2.452089  | -7.746035 | 1.768747  |
| 99  | 1 | 0 | 2.217134  | -5.812795 | 3.316970  |
| 100 | 1 | 0 | 2.731787  | -3.522551 | 2.525705  |
| 101 | 1 | 0 | -8.421397 | -4.819738 | 0.893354  |
| 102 | 1 | 0 | -8.905943 | -5.628627 | -1.397620 |
| 103 | 1 | 0 | -7.464010 | -4.929076 | -3.291858 |
| 104 | 1 | 0 | 8.421112  | -4.820389 | 0.893658  |
| 105 | 1 | 0 | 8.905902  | -5.628778 | -1.397437 |
| 106 | 1 | 0 | 7.464247  | -4.928696 | -3.291698 |
| 107 | 1 | 0 | -5.605205 | -3.718318 | 2.213858  |
| 108 | 1 | 0 | -6.150626 | -2.119685 | 1.691449  |
| 109 | 1 | 0 | -7.314606 | -3.288858 | 2.333224  |
| 110 | 1 | 0 | -5.691872 | -3.637361 | -4.180207 |
| 111 | 1 | 0 | -5.148214 | -2.240964 | -3.212658 |
| 112 | 1 | 0 | -4.247679 | -3.750191 | -3.165238 |
| 113 | 1 | 0 | 5.692338  | -3.636663 | -4.179981 |
| 114 | 1 | 0 | 4.248008  | -3.749832 | -3.165255 |
| 115 | 1 | 0 | 5.148462  | -2.240533 | -3.212156 |
| 116 | 1 | 0 | 6.150358  | -2.120370 | 1.692078  |
| 117 | 1 | 0 | 5.604944  | -3.719119 | 2.214122  |
| 118 | 1 | 0 | 7.314326  | -3.289649 | 2.333689  |
| 119 | 1 | 0 | 1.222651  | 3.199039  | 1.101372  |
| 120 | 1 | 0 | -1.222428 | 3.199092  | 1.101433  |
| 121 | 1 | 0 | -1.237272 | 0.441043  | -2.186161 |
| 122 | 1 | 0 | 1.237220  | 0.440995  | -2.186226 |
| 123 | 1 | 0 | 3.735666  | 5.086348  | 1.347668  |
| 124 | 1 | 0 | 3.207170  | 7.365896  | 0.569865  |
| 125 | 1 | 0 | 2.452025  | 7.746143  | -1.768079 |
| 126 | 1 | 0 | 2.217110  | 5.813110  | -3.316566 |
| 127 | 1 | 0 | 2.731823  | 3.522768  | -2.525615 |
| 128 | 1 | 0 | -2.731545 | 3.523213  | -2.525274 |

|     |   |   |           |          |           |
|-----|---|---|-----------|----------|-----------|
| 129 | 1 | 0 | -2.216715 | 5.813668 | -3.315808 |
| 130 | 1 | 0 | -2.451671 | 7.746451 | -1.767017 |
| 131 | 1 | 0 | -3.206979 | 7.365842 | 0.570815  |
| 132 | 1 | 0 | -3.735595 | 5.086176 | 1.348206  |
| 133 | 1 | 0 | 7.464567  | 4.928212 | 3.291642  |
| 134 | 1 | 0 | 8.906073  | 5.628549 | 1.397363  |
| 135 | 1 | 0 | 8.421124  | 4.820443 | -0.893800 |
| 136 | 1 | 0 | -8.420895 | 4.820825 | -0.893801 |
| 137 | 1 | 0 | -8.905996 | 5.628663 | 1.397422  |
| 138 | 1 | 0 | -7.464683 | 4.928017 | 3.291733  |
| 139 | 1 | 0 | 4.248343  | 3.749363 | 3.165324  |
| 140 | 1 | 0 | 5.148771  | 2.240036 | 3.211897  |
| 141 | 1 | 0 | 5.692764  | 3.635998 | 4.179894  |
| 142 | 1 | 0 | 7.314228  | 3.289903 | -2.333954 |
| 143 | 1 | 0 | 6.150417  | 2.120456 | -1.692354 |
| 144 | 1 | 0 | 5.604822  | 3.719218 | -2.214173 |
| 145 | 1 | 0 | -5.693111 | 3.635438 | 4.179975  |
| 146 | 1 | 0 | -5.148869 | 2.239747 | 3.211731  |
| 147 | 1 | 0 | -4.248560 | 3.749168 | 3.165638  |
| 148 | 1 | 0 | -5.604606 | 3.719805 | -2.214115 |
| 149 | 1 | 0 | -6.150066 | 2.120916 | -1.692542 |
| 150 | 1 | 0 | -7.313963 | 3.290331 | -2.334036 |

**Table S3.** Atomic coordinates for DFT optimization of **grid** structure (theory level: B3LYP/6,31-g(d,p) PCM: CH<sub>2</sub>Cl<sub>2</sub>)

Standard orientation:

| Center Number | Atomic Number | Atomic Type | Coordinates (Angstroms) |          |           |
|---------------|---------------|-------------|-------------------------|----------|-----------|
|               |               |             | X                       | Y        | Z         |
| 1             | 6             | 0           | -1.354459               | 4.118025 | -0.922689 |
| 2             | 6             | 0           | -0.313417               | 3.201487 | -1.146473 |
| 3             | 6             | 0           | 0.833661                | 3.216279 | -0.355199 |
| 4             | 6             | 0           | 0.985922                | 4.134298 | 0.696506  |
| 5             | 6             | 0           | -0.057521               | 5.049887 | 0.920549  |
| 6             | 6             | 0           | -1.205189               | 5.032696 | 0.132908  |
| 7             | 7             | 0           | -2.573304               | 4.115634 | -1.642980 |
| 8             | 7             | 0           | 2.203169                | 4.160121 | 1.416690  |
| 9             | 6             | 0           | 2.253863                | 4.328461 | 2.741156  |
| 10            | 7             | 0           | 3.442876                | 4.661067 | 3.268113  |
| 11            | 6             | 0           | 1.111374                | 4.048629 | 3.660760  |
| 12            | 6             | 0           | -2.646511               | 4.097783 | -2.972463 |
| 13            | 7             | 0           | -3.867976               | 3.955827 | -3.514236 |
| 14            | 6             | 0           | -1.482420               | 4.306530 | -3.883673 |
| 15            | 8             | 0           | -4.966075               | 3.826255 | -2.696820 |
| 16            | 6             | 0           | 3.789344                | 4.736964 | 4.661284  |
| 17            | 8             | 0           | 4.519886                | 4.852195 | 2.441233  |
| 18            | 6             | 0           | -4.219491               | 4.084127 | -4.902146 |
| 19            | 6             | 0           | -0.727006               | 5.483400 | -3.763157 |
| 20            | 6             | 0           | 0.349436                | 5.719228 | -4.616664 |
| 21            | 6             | 0           | 0.696876                | 4.775233 | -5.586079 |
| 22            | 6             | 0           | -0.035761               | 3.592020 | -5.695491 |
| 23            | 6             | 0           | -1.121383               | 3.359298 | -4.851254 |

|    |    |   |           |           |           |
|----|----|---|-----------|-----------|-----------|
| 24 | 6  | 0 | 0.667560  | 4.971952  | 4.617289  |
| 25 | 6  | 0 | -0.384172 | 4.648822  | 5.474647  |
| 26 | 6  | 0 | -1.002270 | 3.399684  | 5.390031  |
| 27 | 6  | 0 | -0.573073 | 2.477548  | 4.432309  |
| 28 | 6  | 0 | 0.471652  | 2.801379  | 3.568170  |
| 29 | 6  | 0 | -4.557941 | 2.916728  | -5.611412 |
| 30 | 6  | 0 | -4.945094 | 3.051993  | -6.948587 |
| 31 | 6  | 0 | -5.010324 | 4.307778  | -7.551798 |
| 32 | 6  | 0 | -4.714126 | 5.452532  | -6.815488 |
| 33 | 6  | 0 | -4.328612 | 5.365024  | -5.471685 |
| 34 | 6  | 0 | 3.978812  | 6.012959  | 5.224990  |
| 35 | 6  | 0 | 4.364109  | 6.085047  | 6.567090  |
| 36 | 6  | 0 | 4.572144  | 4.926155  | 7.315519  |
| 37 | 6  | 0 | 4.420008  | 3.675204  | 6.722364  |
| 38 | 6  | 0 | 4.040235  | 3.555588  | 5.379110  |
| 39 | 6  | 0 | -4.511195 | 1.559065  | -4.953492 |
| 40 | 6  | 0 | -4.058622 | 6.613929  | -4.669333 |
| 41 | 6  | 0 | 3.925928  | 2.198789  | 4.730374  |
| 42 | 6  | 0 | 3.783347  | 7.264363  | 4.404339  |
| 43 | 30 | 0 | -4.408308 | 3.971610  | -0.827951 |
| 44 | 30 | 0 | 4.039764  | 4.306664  | 0.616662  |
| 45 | 6  | 0 | -5.021009 | -1.479569 | -0.120516 |
| 46 | 6  | 0 | -4.050546 | -0.635505 | -0.678314 |
| 47 | 6  | 0 | -4.017289 | 0.720306  | -0.365647 |
| 48 | 6  | 0 | -4.963175 | 1.301775  | 0.499893  |
| 49 | 6  | 0 | -5.930388 | 0.448818  | 1.064208  |
| 50 | 6  | 0 | -5.939399 | -0.915125 | 0.774689  |
| 51 | 7  | 0 | -5.028599 | -2.878282 | -0.387205 |
| 52 | 7  | 0 | -4.926037 | 2.705236  | 0.648672  |
| 53 | 6  | 0 | -5.405853 | 3.384863  | 1.694190  |
| 54 | 7  | 0 | -5.526884 | 4.714876  | 1.549948  |
| 55 | 6  | 0 | -5.695004 | 2.794331  | 3.035878  |
| 56 | 6  | 0 | -5.610158 | -3.386465 | -1.470209 |
| 57 | 7  | 0 | -5.457691 | -4.704276 | -1.691343 |
| 58 | 6  | 0 | -6.395812 | -2.587515 | -2.458585 |
| 59 | 8  | 0 | -4.701597 | -5.454858 | -0.816964 |
| 60 | 6  | 0 | -5.966298 | 5.660712  | 2.540687  |
| 61 | 8  | 0 | -5.182086 | 5.312768  | 0.364605  |
| 62 | 6  | 0 | -6.187551 | -5.506721 | -2.634311 |
| 63 | 6  | 0 | -7.545847 | -1.888843 | -2.059555 |
| 64 | 6  | 0 | -8.271429 | -1.137846 | -2.983893 |
| 65 | 6  | 0 | -7.853958 | -1.066607 | -4.314232 |
| 66 | 6  | 0 | -6.703815 | -1.748545 | -4.716141 |
| 67 | 6  | 0 | -5.978067 | -2.502577 | -3.794210 |
| 68 | 6  | 0 | -6.960954 | 2.867777  | 3.633060  |
| 69 | 6  | 0 | -7.180153 | 2.305742  | 4.890876  |
| 70 | 6  | 0 | -6.136533 | 1.673742  | 5.569508  |
| 71 | 6  | 0 | -4.872862 | 1.595536  | 4.979475  |
| 72 | 6  | 0 | -4.653951 | 2.143472  | 3.715982  |
| 73 | 6  | 0 | -5.486704 | -6.062969 | -3.721173 |
| 74 | 6  | 0 | -6.191671 | -6.880165 | -4.610137 |
| 75 | 6  | 0 | -7.545961 | -7.150892 | -4.414928 |
| 76 | 6  | 0 | -8.207595 | -6.627805 | -3.307078 |
| 77 | 6  | 0 | -7.538732 | -5.810426 | -2.386270 |
| 78 | 6  | 0 | -7.270448 | 6.179109  | 2.420465  |
| 79 | 6  | 0 | -7.680333 | 7.141340  | 3.348057  |
| 80 | 6  | 0 | -6.815802 | 7.585078  | 4.349159  |

|     |    |   |           |           |           |
|-----|----|---|-----------|-----------|-----------|
| 81  | 6  | 0 | -5.518004 | 7.085845  | 4.422389  |
| 82  | 6  | 0 | -5.061767 | 6.124284  | 3.510758  |
| 83  | 6  | 0 | -4.015471 | -5.798134 | -3.921905 |
| 84  | 6  | 0 | -8.259440 | -5.297461 | -1.163856 |
| 85  | 6  | 0 | -3.642679 | 5.620074  | 3.578654  |
| 86  | 6  | 0 | -8.198162 | 5.716391  | 1.323309  |
| 87  | 30 | 0 | -4.039814 | -4.306781 | 0.616686  |
| 88  | 6  | 0 | 5.021001  | 1.479464  | -0.120550 |
| 89  | 6  | 0 | 4.050593  | 0.635382  | -0.678423 |
| 90  | 6  | 0 | 4.017338  | -0.720434 | -0.365769 |
| 91  | 6  | 0 | 4.963174  | -1.301888 | 0.499838  |
| 92  | 6  | 0 | 5.930334  | -0.448917 | 1.064216  |
| 93  | 6  | 0 | 5.939336  | 0.915031  | 0.774715  |
| 94  | 7  | 0 | 5.028581  | 2.878187  | -0.387199 |
| 95  | 7  | 0 | 4.926105  | -2.705351 | 0.648587  |
| 96  | 6  | 0 | 5.405912  | -3.384960 | 1.694117  |
| 97  | 7  | 0 | 5.527000  | -4.714971 | 1.549881  |
| 98  | 6  | 0 | 5.695015  | -2.794412 | 3.035815  |
| 99  | 6  | 0 | 5.610158  | 3.386402  | -1.470189 |
| 100 | 7  | 0 | 5.457654  | 4.704209  | -1.691312 |
| 101 | 6  | 0 | 6.395941  | 2.587512  | -2.458509 |
| 102 | 8  | 0 | 4.701501  | 5.454752  | -0.816961 |
| 103 | 6  | 0 | 5.966341  | -5.660818 | 2.540643  |
| 104 | 8  | 0 | 5.182144  | -5.312905 | 0.364565  |
| 105 | 6  | 0 | 6.187502  | 5.506704  | -2.634254 |
| 106 | 6  | 0 | 7.545957  | 1.888868  | -2.059361 |
| 107 | 6  | 0 | 8.271697  | 1.137954  | -2.983640 |
| 108 | 6  | 0 | 7.854413  | 1.066775  | -4.314041 |
| 109 | 6  | 0 | 6.704295  | 1.748685  | -4.716069 |
| 110 | 6  | 0 | 5.978385  | 2.502631  | -3.794194 |
| 111 | 6  | 0 | 6.960950  | -2.867810 | 3.633035  |
| 112 | 6  | 0 | 7.180095  | -2.305759 | 4.890852  |
| 113 | 6  | 0 | 6.136440  | -1.673771 | 5.569444  |
| 114 | 6  | 0 | 4.872788  | -1.595607 | 4.979373  |
| 115 | 6  | 0 | 4.653928  | -2.143575 | 3.715884  |
| 116 | 6  | 0 | 5.486686  | 6.062799  | -3.721207 |
| 117 | 6  | 0 | 6.191633  | 6.880032  | -4.610157 |
| 118 | 6  | 0 | 7.545867  | 7.150945  | -4.414834 |
| 119 | 6  | 0 | 8.207466  | 6.628010  | -3.306887 |
| 120 | 6  | 0 | 7.538623  | 5.810597  | -2.386099 |
| 121 | 6  | 0 | 7.270449  | -6.179321 | 2.420422  |
| 122 | 6  | 0 | 7.680273  | -7.141552 | 3.348040  |
| 123 | 6  | 0 | 6.815715  | -7.585195 | 4.349160  |
| 124 | 6  | 0 | 5.517951  | -7.085875 | 4.422383  |
| 125 | 6  | 0 | 5.061778  | -6.124310 | 3.510726  |
| 126 | 6  | 0 | 4.015509  | 5.797751  | -3.922054 |
| 127 | 6  | 0 | 8.259278  | 5.297783  | -1.163591 |
| 128 | 6  | 0 | 3.642727  | -5.619997 | 3.578598  |
| 129 | 6  | 0 | 8.198171  | -5.716733 | 1.323211  |
| 130 | 30 | 0 | 4.408352  | -3.971789 | -0.827989 |
| 131 | 6  | 0 | 1.354433  | -4.118097 | -0.922714 |
| 132 | 6  | 0 | 0.313368  | -3.201594 | -1.146504 |
| 133 | 6  | 0 | -0.833704 | -3.216412 | -0.355217 |
| 134 | 6  | 0 | -0.985939 | -4.134420 | 0.696497  |
| 135 | 6  | 0 | 0.057523  | -5.049994 | 0.920536  |
| 136 | 6  | 0 | 1.205183  | -5.032775 | 0.132887  |
| 137 | 7  | 0 | 2.573280  | -4.115698 | -1.642998 |

|     |   |   |           |           |           |
|-----|---|---|-----------|-----------|-----------|
| 138 | 7 | 0 | -2.203191 | -4.160248 | 1.416681  |
| 139 | 6 | 0 | -2.253908 | -4.328477 | 2.741162  |
| 140 | 7 | 0 | -3.442941 | -4.660974 | 3.268141  |
| 141 | 6 | 0 | -1.111410 | -4.048604 | 3.660749  |
| 142 | 6 | 0 | 2.646493  | -4.097775 | -2.972467 |
| 143 | 7 | 0 | 3.867991  | -3.955964 | -3.514227 |
| 144 | 6 | 0 | 1.482407  | -4.306304 | -3.883726 |
| 145 | 8 | 0 | 4.966112  | -3.826593 | -2.696794 |
| 146 | 6 | 0 | -3.789361 | -4.736867 | 4.661317  |
| 147 | 8 | 0 | -4.519953 | -4.852155 | 2.441256  |
| 148 | 6 | 0 | 4.219486  | -4.084126 | -4.902149 |
| 149 | 6 | 0 | 0.726910  | -5.483134 | -3.763385 |
| 150 | 6 | 0 | -0.349602 | -5.718722 | -4.616870 |
| 151 | 6 | 0 | -0.697042 | -4.774513 | -5.586074 |
| 152 | 6 | 0 | 0.035694  | -3.591344 | -5.695322 |
| 153 | 6 | 0 | 1.121392  | -3.358864 | -4.851114 |
| 154 | 6 | 0 | -0.667604 | -4.971876 | 4.617331  |
| 155 | 6 | 0 | 0.384166  | -4.648731 | 5.474635  |
| 156 | 6 | 0 | 1.002323  | -3.399631 | 5.389902  |
| 157 | 6 | 0 | 0.573133  | -2.477544 | 4.432130  |
| 158 | 6 | 0 | -0.471644 | -2.801385 | 3.568058  |
| 159 | 6 | 0 | 4.558095  | -2.916686 | -5.611271 |
| 160 | 6 | 0 | 4.945223  | -3.051841 | -6.948465 |
| 161 | 6 | 0 | 5.010266  | -4.307561 | -7.551838 |
| 162 | 6 | 0 | 4.713900  | -5.452361 | -6.815669 |
| 163 | 6 | 0 | 4.328409  | -5.364962 | -5.471851 |
| 164 | 6 | 0 | -3.978964 | -6.012849 | 5.225007  |
| 165 | 6 | 0 | -4.364194 | -6.084913 | 6.567127  |
| 166 | 6 | 0 | -4.572035 | -4.926009 | 7.315591  |
| 167 | 6 | 0 | -4.419784 | -3.675065 | 6.722454  |
| 168 | 6 | 0 | -4.040079 | -3.555472 | 5.379177  |
| 169 | 6 | 0 | 4.511538  | -1.559094 | -4.953192 |
| 170 | 6 | 0 | 4.058221  | -6.613928 | -4.669659 |
| 171 | 6 | 0 | -3.925626 | -2.198675 | 4.730463  |
| 172 | 6 | 0 | -3.783734 | -7.264257 | 4.404308  |
| 173 | 1 | 0 | -0.406344 | 2.466197  | -1.939031 |
| 174 | 1 | 0 | 1.623572  | 2.493245  | -0.534102 |
| 175 | 1 | 0 | 0.038117  | 5.792427  | 1.705474  |
| 176 | 1 | 0 | -1.997874 | 5.752684  | 0.314959  |
| 177 | 1 | 0 | -0.987972 | 6.212851  | -3.003735 |
| 178 | 1 | 0 | 0.916106  | 6.640024  | -4.522619 |
| 179 | 1 | 0 | 1.535980  | 4.960008  | -6.249762 |
| 180 | 1 | 0 | 0.234587  | 2.849297  | -6.439839 |
| 181 | 1 | 0 | -1.683888 | 2.436982  | -4.939096 |
| 182 | 1 | 0 | 1.137559  | 5.945702  | 4.689231  |
| 183 | 1 | 0 | -0.718381 | 5.373989  | 6.210172  |
| 184 | 1 | 0 | -1.815875 | 3.148112  | 6.063391  |
| 185 | 1 | 0 | -1.047818 | 1.503667  | 4.359696  |
| 186 | 1 | 0 | 0.800866  | 2.087167  | 2.820830  |
| 187 | 1 | 0 | -5.204810 | 2.162752  | -7.516308 |
| 188 | 1 | 0 | -5.314140 | 4.394998  | -8.590916 |
| 189 | 1 | 0 | -4.798000 | 6.432304  | -7.277446 |
| 190 | 1 | 0 | 4.508075  | 7.060193  | 7.023793  |
| 191 | 1 | 0 | 4.872677  | 4.999784  | 8.356600  |
| 192 | 1 | 0 | 4.613871  | 2.774377  | 7.298030  |
| 193 | 1 | 0 | -4.889598 | 1.607995  | -3.930253 |
| 194 | 1 | 0 | -5.112125 | 0.838966  | -5.513613 |

|     |   |   |           |           |           |
|-----|---|---|-----------|-----------|-----------|
| 195 | 1 | 0 | -3.489170 | 1.162770  | -4.907750 |
| 196 | 1 | 0 | -2.986388 | 6.832704  | -4.614778 |
| 197 | 1 | 0 | -4.547763 | 7.476510  | -5.128830 |
| 198 | 1 | 0 | -4.427314 | 6.514563  | -3.644849 |
| 199 | 1 | 0 | 4.489814  | 1.454505  | 5.297237  |
| 200 | 1 | 0 | 2.884183  | 1.861449  | 4.681688  |
| 201 | 1 | 0 | 4.313934  | 2.212523  | 3.708291  |
| 202 | 1 | 0 | 2.725782  | 7.443728  | 4.175733  |
| 203 | 1 | 0 | 4.158036  | 8.140111  | 4.939390  |
| 204 | 1 | 0 | 4.306248  | 7.179611  | 3.448375  |
| 205 | 1 | 0 | -3.321993 | -1.047270 | -1.370284 |
| 206 | 1 | 0 | -3.251644 | 1.352813  | -0.804671 |
| 207 | 1 | 0 | -6.696648 | 0.847546  | 1.716658  |
| 208 | 1 | 0 | -6.692374 | -1.552984 | 1.228433  |
| 209 | 1 | 0 | -7.874874 | -1.936742 | -1.028159 |
| 210 | 1 | 0 | -9.162700 | -0.607795 | -2.662658 |
| 211 | 1 | 0 | -8.419696 | -0.480748 | -5.032186 |
| 212 | 1 | 0 | -6.370291 | -1.696096 | -5.748108 |
| 213 | 1 | 0 | -5.079091 | -3.020203 | -4.109045 |
| 214 | 1 | 0 | -7.778191 | 3.352824  | 3.111823  |
| 215 | 1 | 0 | -8.166650 | 2.364328  | 5.340207  |
| 216 | 1 | 0 | -6.307275 | 1.243636  | 6.551684  |
| 217 | 1 | 0 | -4.055555 | 1.108348  | 5.502256  |
| 218 | 1 | 0 | -3.673156 | 2.079180  | 3.256169  |
| 219 | 1 | 0 | -5.667886 | -7.312620 | -5.458148 |
| 220 | 1 | 0 | -8.078667 | -7.788392 | -5.114542 |
| 221 | 1 | 0 | -9.253336 | -6.867842 | -3.135728 |
| 222 | 1 | 0 | -8.684590 | 7.549527  | 3.277030  |
| 223 | 1 | 0 | -7.149562 | 8.334850  | 5.060538  |
| 224 | 1 | 0 | -4.836740 | 7.454277  | 5.184361  |
| 225 | 1 | 0 | -3.480336 | -5.846001 | -2.971055 |
| 226 | 1 | 0 | -3.586315 | -6.531490 | -4.609137 |
| 227 | 1 | 0 | -3.832065 | -4.805419 | -4.349850 |
| 228 | 1 | 0 | -8.666591 | -4.293895 | -1.329740 |
| 229 | 1 | 0 | -9.097222 | -5.953076 | -0.912758 |
| 230 | 1 | 0 | -7.593127 | -5.245513 | -0.299005 |
| 231 | 1 | 0 | -3.576043 | 4.678987  | 4.134915  |
| 232 | 1 | 0 | -3.232908 | 5.436584  | 2.582283  |
| 233 | 1 | 0 | -3.001656 | 6.345159  | 4.086186  |
| 234 | 1 | 0 | -7.670295 | 5.667641  | 0.367927  |
| 235 | 1 | 0 | -8.600200 | 4.715542  | 1.523114  |
| 236 | 1 | 0 | -9.048217 | 6.395911  | 1.225480  |
| 237 | 1 | 0 | 3.322076  | 1.047140  | -1.370435 |
| 238 | 1 | 0 | 3.251738  | -1.352954 | -0.804856 |
| 239 | 1 | 0 | 6.696576  | -0.847627 | 1.716697  |
| 240 | 1 | 0 | 6.692274  | 1.552891  | 1.228518  |
| 241 | 1 | 0 | 7.874837  | 1.936730  | -1.027917 |
| 242 | 1 | 0 | 9.162946  | 0.607923  | -2.662313 |
| 243 | 1 | 0 | 8.420279  | 0.480988  | -5.031954 |
| 244 | 1 | 0 | 6.370917  | 1.696281  | -5.748086 |
| 245 | 1 | 0 | 5.079431  | 3.020235  | -4.109126 |
| 246 | 1 | 0 | 7.778215  | -3.352836 | 3.111829  |
| 247 | 1 | 0 | 8.166576  | -2.364318 | 5.340220  |
| 248 | 1 | 0 | 6.307151  | -1.243644 | 6.551617  |
| 249 | 1 | 0 | 4.055458  | -1.108408 | 5.502109  |
| 250 | 1 | 0 | 3.673139  | -2.079316 | 3.256053  |
| 251 | 1 | 0 | 5.667871  | 7.312363  | -5.458245 |

|     |   |   |           |           |           |
|-----|---|---|-----------|-----------|-----------|
| 252 | 1 | 0 | 8.078557  | 7.788472  | -5.114435 |
| 253 | 1 | 0 | 9.253159  | 6.868196  | -3.135454 |
| 254 | 1 | 0 | 8.684491  | -7.549830 | 3.277008  |
| 255 | 1 | 0 | 7.149422  | -8.334977 | 5.060554  |
| 256 | 1 | 0 | 4.836666  | -7.454242 | 5.184369  |
| 257 | 1 | 0 | 3.480293  | 5.845529  | -2.971244 |
| 258 | 1 | 0 | 3.586280  | 6.531050  | -4.609301 |
| 259 | 1 | 0 | 3.832281  | 4.805013  | -4.350026 |
| 260 | 1 | 0 | 9.096983  | 5.953486  | -0.912469 |
| 261 | 1 | 0 | 7.592899  | 5.245833  | -0.298792 |
| 262 | 1 | 0 | 8.666527  | 4.294240  | -1.329379 |
| 263 | 1 | 0 | 3.576157  | -4.678908 | 4.134861  |
| 264 | 1 | 0 | 3.232997  | -5.436475 | 2.582218  |
| 265 | 1 | 0 | 3.001635  | -6.345031 | 4.086112  |
| 266 | 1 | 0 | 8.600541  | -4.716034 | 1.523099  |
| 267 | 1 | 0 | 9.048012  | -6.396494 | 1.225195  |
| 268 | 1 | 0 | 7.670222  | -5.667718 | 0.367889  |
| 269 | 1 | 0 | 0.406265  | -2.466302 | -1.939064 |
| 270 | 1 | 0 | -1.623641 | -2.493406 | -0.534115 |
| 271 | 1 | 0 | -0.038090 | -5.792528 | 1.705467  |
| 272 | 1 | 0 | 1.997890  | -5.752742 | 0.314919  |
| 273 | 1 | 0 | 0.987862  | -6.212746 | -3.004112 |
| 274 | 1 | 0 | -0.916328 | -6.639496 | -4.522954 |
| 275 | 1 | 0 | -1.536231 | -4.959078 | -6.249710 |
| 276 | 1 | 0 | -0.234643 | -2.848462 | -6.439515 |
| 277 | 1 | 0 | 1.683968  | -2.436579 | -4.938828 |
| 278 | 1 | 0 | -1.137641 | -5.945600 | 4.689361  |
| 279 | 1 | 0 | 0.718367  | -5.373860 | 6.210201  |
| 280 | 1 | 0 | 1.815979  | -3.148061 | 6.063201  |
| 281 | 1 | 0 | 1.047934  | -1.503696 | 4.359424  |
| 282 | 1 | 0 | -0.800857 | -2.087208 | 2.820684  |
| 283 | 1 | 0 | 5.205063  | -2.162566 | -7.516075 |
| 284 | 1 | 0 | 5.314057  | -4.394694 | -8.590970 |
| 285 | 1 | 0 | 4.797615  | -6.432090 | -7.277749 |
| 286 | 1 | 0 | -4.508277 | -7.060047 | 7.023820  |
| 287 | 1 | 0 | -4.872522 | -4.999626 | 8.356686  |
| 288 | 1 | 0 | -4.613501 | -2.774225 | 7.298148  |
| 289 | 1 | 0 | 4.889903  | -1.608199 | -3.929947 |
| 290 | 1 | 0 | 5.112592  | -0.839024 | -5.513212 |
| 291 | 1 | 0 | 3.489574  | -1.162644 | -4.907438 |
| 292 | 1 | 0 | 2.985955  | -6.832561 | -4.615144 |
| 293 | 1 | 0 | 4.547247  | -7.476521 | -5.129256 |
| 294 | 1 | 0 | 4.426914  | -6.514741 | -3.645158 |
| 295 | 1 | 0 | -4.489391 | -1.454322 | 5.297357  |
| 296 | 1 | 0 | -2.883836 | -1.861474 | 4.681748  |
| 297 | 1 | 0 | -4.313663 | -2.212341 | 3.708392  |
| 298 | 1 | 0 | -2.726169 | -7.443989 | 4.175982  |
| 299 | 1 | 0 | -4.158870 | -8.139911 | 4.939201  |
| 300 | 1 | 0 | -4.306362 | -7.179260 | 3.448218  |

---

## 10. References

1. M. J. Frisch, G. W. Trucks, H. B. Schlegel, G. E. Scuseria, M. A. Robb, J. R. Cheeseman, G. Scalmani, V. Barone, B. Mennucci, G. A. Petersson, H. Nakatsuji, M. Caricato, X. Li, H. P. Hratchian, A. F. Izmaylov, J. Bloino, G. Zheng, J. L. Sonnenberg, M. Hada, M. Ehara, K. Toyota, R. Fukuda, J. Hasegawa, M. Ishida, T. Nakajima, Y. Honda, O. Kitao, H. Nakai, T. Vreven, J. A. Montgomery, J. E. Peralta, F. Ogliaro, M. Bearpark, J. J. Heyd, E. Brothers, K. N. Kudin, V. N. Staroverov, R. Kobayashi, J. Normand, K. Raghavachari, A. Rendell, J. C. Burant, S. S. Iyengar, J. Tomasi, M. Cossi, N. Rega, J. M. Millam, M. Klene, J. E. Knox, J. B. Cross, V. Bakken, C. Adamo, J. Jaramillo, R. Gomperts, R. E. Stratmann, O. Yazyev, A. J. Austin, R. Cammi, C. Pomelli, J. W. Ochterski, R. L. Martin, K. Morokuma, V. G. Zakrzewski, G. A. Voth, P. Salvador, J. J. Dannenberg, S. Dapprich, A. D. Daniels, O. Farkas, J. B. Foresman, J. V. Ortiz, J. Cioslowski and D. J. Fox, *Gaussian 09*, 2009.
2. a) C. Lee, W. Yang and R. G. Parr, *Phys. Rev. B: Condens. Matter*, 1988, **37**, 785-789; b) B. Miehlich, A. Savin, H. Stoll and H. Preuss, *Chem. Phys. Lett.*, 1989, **157**, 200-206.
3. M. M. Francl, W. J. Pietro, W. J. Hehre, J. S. Binkley, M. S. Gordon, D. J. DeFrees and J. A. Pople, *Journal of Chemical Physics*, 1982, **77**, 3654-3665.
4. J. Tomasi, B. Mennucci and R. Cammi, *Chem. Rev.*, 2005, **105**, 2999-3094.
5. R. D. K. Dennington II, T.; Millam, J.; Eppinnett, K.; Hovell, W. L.; Gilliland, R., *GaussView 3.0.9*, 2003, Semichem, Inc.; Shawnee Mission, KS.
6. R. K. Thomson, B. O. Patrick and L. L. Schafer, *Can. J. Chem.*, 2005, **83**, 1037-1042.
7. a) M. Kakimoto, S. Ogata, A. Mochizuki and Y. Imai, *Chem. Lett.*, 1984, **13**, 821-824; b) S. Ogata, A. Mochizuki, M. Kakimoto and Y. Imai, *Bull. Chem. Soc. Jpn.*, 1986, **59**, 2171-2177.
8. J. I. Clodt, R. Froehlich, M. Eul and E.-U. Wuerthwein, *Eur. J. Inorg. Chem.*, 2012, **2012**, 1210-1217.
9. Bruker, *APEX2 and SAINT*, 2013, Bruker AXS Inc., Madison, Wisconsin, USA.
10. Bruker, *SADABS and TWINABS*, 2014, Bruker AXS Inc., Madison, Wisconsin, USA.
11. O. V. Dolomanov, Bourhis, L. J., Gildea, R. J., Howard, J. A. K., Puschmann, H., *J. Appl. Cryst.*, 2009, **42**, 339-341.
12. a) G. M. Sheldrick, *Acta Crystallogr., Sect. A: Found. Crystallogr.*, 2008, **64**, 112-122; b) G. M. Sheldrick, *Acta Crystallogr., Sect. A*, 2015, **71**, 3-8.
13. L. J. Farrugia, *J. Appl. Crystallogr.*, 1997, **30**, 565.
14. CCDC, *Mercury*, 2020.
15. POV-Ray, *POV-Ray 3.7.0*, 2013, Persistence of Vision Pty. Ltd., Persistence of Vision Raytracer, retrieved from <http://www.povray.org/download/>.
16. A. L. Spek, *Acta Crystallogr., Sect. D: Biol. Crystallogr.*, 2009, **65**, 148-155.
17. S. P. Westrip, *J. Appl. Crystallogr.*, 2010, **43**, 920-925.
18. F. Allen, *Acta Crystallogr., Sect. B: Struct. Sci.*, 2002, **58**, 380-388.
